1 TITLE

2 Novel *KITLG/SCF* regulatory variants are associated with lung function in African American  
3 children with asthma

4 AUTHORS

5 Angel CY Mak<sup>1,\*</sup>, Satria Sajuthi<sup>2,^</sup>, Jaehyun Joo<sup>3,^</sup>, Shujie Xiao<sup>4,^</sup>, Patrick M Sleiman<sup>5,6,^</sup>, Marquitta  
6 J White<sup>1,^</sup>, Eunice Y Lee<sup>1</sup>, Benjamin Saef<sup>3</sup>, Donglei Hu<sup>1</sup>, Hongsheng Gui<sup>4</sup>, Kevin L Keys<sup>1,7</sup>, Fred  
7 Lurmann<sup>8</sup>, Deepti Jain<sup>9</sup>, Gonçalo Abecasis<sup>10</sup>, Hyun Min Kang<sup>10</sup>, Deborah A. Nickerson<sup>11,12,13</sup>, Soren  
8 Germer<sup>14</sup>, Michael C Zody<sup>14</sup>, Lara Winterkorn<sup>14</sup>, Catherine Reeves<sup>14</sup>, Scott Huntsman<sup>1</sup>, Celeste  
9 Eng<sup>1</sup>, Sandra Salazar<sup>1</sup>, Sam S Oh<sup>1</sup>, Frank D Gilliland<sup>15</sup>, Zhanghua Chen<sup>15</sup>, Rajesh Kumar<sup>16</sup>, Fernando  
10 D Martínez<sup>17</sup>, Ann Chen Wu<sup>18</sup>, Elad Ziv<sup>1</sup>, Hakon Hakonarson<sup>5,6,#</sup>, Blanca E Himes<sup>3,#</sup>, L Keoki  
11 Williams<sup>4,#</sup>, Max A Seibold<sup>3,#</sup>, Esteban G. Burchard<sup>1,19</sup>

12 <sup>1</sup>Department of Medicine, University of California San Francisco, San Francisco, CA, USA

13 <sup>2</sup>Center for Genes, Environment, and Health, National Jewish Health, Denver, CO, USA

14 <sup>3</sup>Department of Biostatistics, Epidemiology, and Informatics, Perelman School of Medicine,  
15 University of Pennsylvania, Philadelphia, PA, USA

16 <sup>4</sup>Center for Individualized and Genomic Medicine Research, Department of Internal Medicine,  
17 Henry Ford Health System, Detroit, MI, USA

18 <sup>5</sup>Center for Applied Genomics, Children's Hospital of Philadelphia, Philadelphia, PA, USA

19 <sup>6</sup> Department of Human Genetics, Children’s Hospital of Philadelphia, Philadelphia, PA, USA

20 <sup>7</sup> Berkeley Institute for Data Science, University of California, Berkeley, CA, USA

21 <sup>8</sup> Sonoma Technology Inc, Petaluma, CA, USA

22 <sup>9</sup> Department of Biostatistics, University of Washington, Seattle, WA, USA

23 <sup>10</sup> Center for Statistical Genetics, University of Michigan, Ann Arbor, MI, USA

24 <sup>11</sup> Department of Genome Sciences, University of Washington, Seattle, WA, USA

25 <sup>12</sup> Northwest Genomics Center, Seattle, WA, USA

26 <sup>13</sup> Brotman Baty Institute, Seattle, WA, USA

27 <sup>14</sup> New York Genome Center, New York, NY, USA

28 <sup>15</sup> Department of Preventive Medicine, Division of Environmental Health, Keck School of Medicine,  
29 University of Southern California, Los Angeles, CA, USA

30 <sup>16</sup> Ann and Robert H. Lurie Children's Hospital of Chicago, Chicago, IL, USA

31 <sup>17</sup> Asthma and Airway Disease Research Center, University of Arizona, Tucson, AZ, USA

32 <sup>18</sup> Precision Medicine Translational Research (PRoMoTeR) Center, Department of Population  
33 Medicine, Harvard Medical School and Pilgrim Health Care Institute, Boston, MA, USA

34 <sup>19</sup> Department of Bioengineering and Therapeutic Sciences, University of California, San Francisco,  
35 CA, USA

36 ^,# These authors contributed equally to this work

37 \* Corresponding author

38 Angel CY Mak

39 Address: Box 2911, 1550 4<sup>th</sup> Street, San Francisco, CA 94112

40 Tel: 415-514-9931

41 Email: [angelcymak@gmail.com](mailto:angelcymak@gmail.com)

## 42 AUTHOR CONTRIBUTIONS

43 ACYM, SSaj, MJW, SSO, FG, ZC, RK, FDM, ACW, EZ, and EGB designed and supervised the study.

44 ACYM, SSaj, JJ, SX, PS, MJW, EYL, BS, DH, SH, BEH, HH, LKW, and MAS supervised/performed

45 analyses and/or interpreted results. CE processed biospecimens for whole genome sequencing.

46 FL estimated air pollution exposure. DJ, GA, HMK, DAN, and SG contributed to TOPMed WGS data

47 generation and/or analysis. MZ, LW, and CR contributed to CCDG WGS data generation. SSaj

48 coordinated study recruitment and processed phenotype data ACYM, SSaj, JJ, SX, PS, MJW, EYL,

49 BS, HG, KLK, SG, BEH, HH, LKW, MAS, and EGB wrote and/or critically reviewed the manuscript.

## 50 SHORT TITLE

51 *KITLG* associated with FEV<sub>1</sub> in AA youths

## 52 KEYWORDS

53 GWAS, African American, FEV<sub>1</sub>, gene-by-environment interaction, GxE, air pollution, *KITLG*, SCF

## 54 ABSTRACT

55 Baseline lung function, quantified as forced expiratory volume in the first second of exhalation  
56 (FEV<sub>1</sub>), is a standard diagnostic criterion used by clinicians to identify and classify lung diseases.  
57 Using whole genome sequencing data from the National Heart, Lung, and Blood Institute  
58 TOPMed project, we identified a novel genetic association with FEV<sub>1</sub> on chromosome 12 in 867  
59 African American children with asthma ( $p = 1.26 \times 10^{-8}$ ,  $\beta = 0.302$ ). Conditional analysis within 1  
60 Mb of the tag signal (rs73429450) yielded one major and two other weaker independent signals  
61 within this peak. We explored statistical and functional evidence for all variants in linkage  
62 disequilibrium with the three independent signals and yielded 9 variants as the most likely  
63 candidates responsible for the association with FEV<sub>1</sub>. Hi-C data and eQTL analysis demonstrated  
64 that these variants physically interacted with *KITLG* (*aka SCF*) and their minor alleles were  
65 associated with increased expression of *KITLG* gene in nasal epithelial cells. Gene-by-air-pollution  
66 interaction analysis found that the candidate variant rs58475486 interacted with past-year SO<sub>2</sub>  
67 exposure ( $p = 0.003$ ,  $\beta = 0.32$ ). This study identified a novel protective genetic association with  
68 FEV<sub>1</sub>, possibly mediated through *KITLG*, in African American children with asthma.

## 69 INTRODUCTION

70 Asthma, a chronic pulmonary condition characterized by reversible airway obstruction, is one of  
71 the hallmark diseases of childhood in the United States (World Health Organization 2017).  
72 Asthma is also the most disparate common disease in the pediatric clinic, with significant  
73 variation in prevalence, morbidity, and mortality among U.S. racial/ethnic groups (Oh *et al.* 2016).

74 Specifically, African American children carry a higher asthma disease burden compared to their  
75 European American counterparts (Akinbami *et al.* 2014; Akinbami 2015). Forced expiratory  
76 volume in the first second (FEV<sub>1</sub>), a measurement of lung function, is a vital clinical trait used by  
77 physicians to assess overall lung health and diagnose pulmonary diseases such as asthma  
78 (Johnson and Theurer. 2014). We have previously shown that genetic ancestry plays an important  
79 role in FEV<sub>1</sub> variation and that African Americans have lower FEV<sub>1</sub> compared to European  
80 Americans regardless of asthma status (Kumar *et al.* 2010; Pino-Yanes *et al.* 2015). The disparity  
81 in lung function between populations may explain disparities in asthma disease burden.  
82 Understanding the factors that influence FEV<sub>1</sub> variation among individuals with asthma could  
83 lead to improved patient care and therapeutic interventions.

84 Twin and family-based studies estimate that the heritability of FEV<sub>1</sub> ranged from 26% to 81%,  
85 supporting the combined contribution by genetic and environmental factors in FEV<sub>1</sub> variation  
86 (Chatterjee and Das. 1995; Chen *et al.* 1996; Hukkinen *et al.* 2011; Palmer *et al.* 2001; Sillanpaa  
87 *et al.* 2017; Tian *et al.* 2017; Yamada *et al.* 2015). Genome-wide association studies (GWAS) of  
88 FEV<sub>1</sub>, including among individuals with asthma, have identified many variants that contribute to  
89 lung function (Li *et al.* 2013; Liao *et al.* 2014; Repapi *et al.* 2010; Soler Artigas *et al.* 2011; Soler  
90 Artigas *et al.* 2015; Wain *et al.* 2017). A search in NHGRI-EBI GWAS Catalog (version e98\_r2020-  
91 03-08) on baseline lung function (FEV<sub>1</sub>) alone revealed 349 associations (Buniello *et al.* 2019).  
92 Most of these previous GWAS, however, were performed in adult populations of European  
93 descent, and their results may not generalize across populations or across the life span of an  
94 individual (Carlson *et al.* 2013; Martin, A. R. *et al.* 2017; Wojcik *et al.* 2019). Previous GWAS results

95 are also limited due to their reliance on genotyping arrays. In particular, variation in non-coding  
96 regions of the genome is not adequately covered by many genotyping arrays because they were  
97 not designed to account for the population-specific genetic variability of all populations (Kim, M.  
98 S. *et al.* 2018; Zhang and Lupski. 2015). Whole genome sequencing (WGS) is a newer technology  
99 that captures nearly all common variation from coding and non-coding regions of the genome  
100 and is unencumbered by genotype array design constraints and differences in linkage  
101 disequilibrium patterns among populations. To date, no large-scale WGS studies of lung function  
102 have been performed in African American children with asthma (Martin *et al.* 2017).

103 In addition to genetics, FEV<sub>1</sub> is a complex trait that is significantly influenced by both genetic  
104 variation and environmental factors, such as air pollution (Chatterjee and Das. 1995; Hukkinen *et*  
105 *al.* 2011; Palmer *et al.* 2001; Sillanpaa *et al.* 2017; Tian *et al.* 2017; Yamada *et al.* 2015). Exposure  
106 to ambient air pollution has been consistently associated with poor respiratory outcomes,  
107 including reduced FEV<sub>1</sub> (Barraza-Villarreal *et al.* 2008; Brunekreef and Holgate. 2002;  
108 Ierodiakonou *et al.* 2016; Wise 2019). We previously showed that exposure to sulfur dioxide (SO<sub>2</sub>),  
109 an air pollutant emitted by the burning of fossil fuels, is significantly associated with reduced FEV<sub>1</sub>  
110 in African American children with asthma in the SAGE II study (Neophytou *et al.* 2016). Because  
111 the genetic variants associated with FEV<sub>1</sub> thus far do not account for the majority of its estimated  
112 heritability, considering gene-environment (GxE) interactions, specifically gene-by-air-pollution,  
113 may improve our understanding of lung function genetics (Moore 2005; Moore and Williams.  
114 2009). Here, we performed a genome-wide association analysis using WGS data to identify

115 common genetic variants associated with FEV<sub>1</sub> in African American children with asthma in SAGE  
116 II and investigated the effect of GxE (SO<sub>2</sub>) interactions on FEV<sub>1</sub> associations.

## 117 METHODS

### 118 *Study population*

119 This study examined African American children between 8-21 years of age with physician-  
120 diagnosed asthma from the Study of African Americans, Asthma, Genes & Environments (SAGE  
121 II). All SAGE II participants were recruited from the San Francisco Bay Area. The inclusion and  
122 exclusion are previously described in detailed (Oh *et al.* 2012; White *et al.* 2016) . Briefly,  
123 participants were eligible if they were 8-21 years of age and self-identified as African American  
124 and had four African American grandparents. Study exclusion criteria included the following: 1)  
125 any smoking within one year of the recruitment date; 2) 10 or more pack-years of smoking; 3)  
126 pregnancy in the third trimester; 4) history of lung diseases other than asthma (for cases) or  
127 chronic illness (for cases and controls). Baseline lung function defined as forced expiratory  
128 volume in the first second (FEV<sub>1</sub>) was measured by spirometry prior to administering albuterol as  
129 previously described (Oh *et al.* 2012).

### 130 *TOPMed whole genome sequencing data*

131 SAGE II DNA samples were sequenced as part of the Trans-Omics for Precision Medicine (TOPMed)  
132 whole genome sequencing (WGS) program (Taliun *et al.* 2019). WGS was performed at the New  
133 York Genome Center and Northwest Genomics Center on a HiSeq X system (Illumina, San Diego,  
134 CA) using a paired-end read length of 150 base pairs (bp), with a minimum of 30x mean genome

135 coverage. DNA sample handling, quality control, library construction, clustering and sequencing,  
136 read processing and sequence data quality control are described in detail in the TOPMed website  
137 (TOPMed 2019). Variant calls were obtained from TOPMed data freeze 8 VCF files corresponding  
138 to the GRCh38 assembly. Variants with a minimal read depth of 10 (DP10) were used for analysis  
139 unless otherwise stated.

#### 140 *Genetic principal components, global ancestry, and kinship estimation*

141 Genetic principal components (PCs), global ancestry, and kinship estimation on genetic  
142 relatedness were computed using biallelic single nucleotide polymorphisms (SNPs) with a PASS  
143 flag from TOPMed freeze 8 DP10 data. PCs and kinship estimates were computed using the PC-  
144 Relate function from the GENESIS R package (Conomos *et al.* 2015; Conomos *et al.* 2016) using a  
145 workflow available from the Summer Institute in Statistical Genetics Module 17 course website  
146 (Summer Institute in Statistical Genetics 2019). African global ancestry was computed using the  
147 ADMIXTURE package (Alexander *et al.* 2009) in supervised mode using European (CEU), African  
148 (YRI) and Native American (NAM) reference panels as previously described (Mak, A. C. Y. *et al.*  
149 2018).

#### 150 *FEV<sub>1</sub> GWAS*

151 Non-normality of the distribution of FEV<sub>1</sub> values was tested with the Shapiro-Wilk test in R using  
152 the shapiro.test function. Since FEV<sub>1</sub> was not normally distributed ( $p = 1.41 \times 10^{-8}$  for FEV<sub>1</sub> and  $p$   
153  $= 1.05 \times 10^{-8}$  for  $\log_{10}$  FEV<sub>1</sub>), FEV<sub>1</sub> was regressed on all covariates (age, sex, height, controller  
154 medications, sequencing centers, and the first 5 genetic PCs) and the residuals were inverse-



155 normalized. These inverse-normalized residuals (FEV<sub>1</sub>.res.rnorm) were the main outcome of the  
156 discovery GWAS. The controller medication covariate included the use of inhaled corticosteroids  
157 (ICS), long-acting beta-agonists (LABA), leukotriene inhibitors and/or an ICS/LABA combo in the  
158 2 weeks prior to the recruitment date.

159 Genome-wide single variant analysis was performed on the ENCORE server ([https://github.com](https://github.com/statgen/encore)  
160 [/statgen/encore](https://github.com/statgen/encore)) using the linear Wald test (q.linear) originally implemented in EFACTS  
161 (<https://genome.sph.umich.edu/wiki/EFACTS>) and TOPMed freeze 8 data (DPO PASS) with a  
162 MAF filter of 0.1%. All pairwise relationships with degree 3 or more relatedness (kinship values >  
163 0.044) were identified, and one participant of the related pair was subsequently chosen at  
164 random and removed prior to analysis. All covariates used to obtain FEV<sub>1</sub>.res.rnorm were also  
165 included as covariates in the GWAS as recommended in a recent publication (Sofer *et al.* 2019).  
166 The association analysis was repeated using untransformed FEV<sub>1</sub> and FEV<sub>1</sub> percent predicted  
167 (FEV<sub>1</sub>.perc.predicted). FEV<sub>1</sub> percent predicted was defined as the percentage of measured FEV<sub>1</sub>  
168 relative to predicted FEV<sub>1</sub> estimated by the Hankinson lung function prediction equation for  
169 African Americans (Hankinson *et al.* 1999). A secondary analysis that included smoking-related  
170 covariates (smoking status and number of smokers in the family) was performed in PLINK 1.9  
171 (version 1p9\_2019\_0304\_dev) (Chang *et al.* 2015; Purcell and Chang. 2013). To study whether  
172 association with FEV<sub>1</sub> is specific to SAGE II participants with asthma, we repeated the association  
173 analysis adjusting for age, sex, height and the first 5 genetic PCs in SAGE II participants without  
174 asthma on the ENCORE server. All of these participants were sequenced in the same center.  
175 Regional association results were plotted using LocusZoom 1.4 (Pruim *et al.* 2010) with a 500

176 kilobase (Kb) flanking region. Linkage disequilibrium ( $R^2$ ) was estimated in PLINK 1.9. LD plot was  
177 generated using recoded genotype files (plink --recode 12) in Haploview (Barrett *et al.* 2005) .

178 The function effectiveSize in the R package CODA was used to estimate the actual effective  
179 number of independent tests and CODA-adjusted statistical and suggestive significance p-value  
180 thresholds were defined as 0.05 and 1 divided by the effective number of tests, respectively  
181 (Duggal *et al.* 2008). We compared the CODA-adjusted statistical significance threshold and the  
182 widely used  $5 \times 10^{-8}$  GWAS genome-wide significance threshold (Pe'er *et al.* 2008) and selected  
183 the more stringent threshold for genome-wide significance.

184 The following WGS quality control steps were applied to all reported variants from ENCORE to  
185 ensure WGS variant quality: (1) The variant had VCF FILTER = PASS; (2) Variant quality was  
186 confirmed via manual inspection on the BRAVO server based on TOPMed freeze 5 data  
187 (University of Michigan and NHLBI TOPMed. 2018); (3) Variants were reanalyzed with linear  
188 regression using PLINK 1.9 by applying the arguments --mac 5 --geno 0.1 --hwe 0.0001 using  
189 TOPMed freeze 8 DP10 PASS data.

190 To determine if the rs73429450 association with FEV<sub>1</sub> was only identifiable using whole genome  
191 sequencing data, we repeated the linear regression association analysis on signals that passed  
192 the genome-wide significance threshold using PLINK 1.9 and genotype data generated with  
193 Axiom Genome-Wide LAT 1 array (Affymetrix, Santa Clara, CA, dbGaP phs000921.v1.p1). These  
194 array genotype data were imputed into the following reference panels: 1000 Genomes phase 3  
195 version 5, Haplotype Reference Consortium (HRC) r1.1, the Consortium on Asthma among

196 African-ancestry Populations in the Americas (CAAPA) and the TOPMed phase 5 panels on the  
197 Michigan Imputation Server (Das *et al.* 2016). It should be noted that 500 SAGE II subjects were  
198 part of the TOPMed freeze 5 reference panel.

199 A total of 349 GWAS FEV<sub>1</sub>-associated entries were retrieved from the NHGRI-EBI GWAS Catalog  
200 version 1.0.2-associations\_e98\_r2020-03-08 (Buniello *et al.* 2019) using the trait names “Lung  
201 function (FEV<sub>1</sub>)”, “FEV1”, “Lung function (forced expiratory volume in 1 second)” or  
202 “Prebronchodilator FEV1”. After adding 100 Kb flanking regions to each of the 349 entries, a total  
203 of 230 non-overlapping region were obtained. To look up whether we replicated previously  
204 GWAS loci while control for multiple testing penalties, we only used 279,495 common variants  
205 (MAF >= 0.01) that overlapped with the 230 regions. The 279,495 common variants is equivalent  
206 to 17,755 effective test based on CODA and  $5.63 \times 10^{-5}$  (1/17,755) was used as suggestive p-value  
207 threshold for replication.

### 208 *Conditional analysis*

209 Conditional analysis was performed to identify all independent signals in a GWAS peak using  
210 PLINK 1.9. All TOPMed freeze 8 DP10 variants within 1 megabase (Mb) of the tag association  
211 signal and with association p-value of  $1 \times 10^{-4}$  or smaller in the discovery GWAS were included in  
212 the analysis. Variants were first ordered by ascending p-value. A variant was considered to be an  
213 independent signal if the association p-value after conditioning (conditional p-value) on the tag  
214 signal was smaller than 0.05. Newly identified independent signals were included with the tag  
215 signal for conditioning on the next variant.

## 216 *Region-based association analysis*

217 Region-based association analyses were performed in 1 Kb sliding windows with 500 bp  
218 increments in a 1 Mb flanking region of the tag GWAS signal using the SKAT\_CommonRare  
219 function from the SKAT R package v1.3.2.1 (Ionita-Laza *et al.* 2013) . Default settings were used  
220 with method = "C" and test.type = "Joint". A minor allele frequency (MAF) threshold of 0.01 was  
221 used as the cutoff to distinguish rare and common variants. Variants were annotated in TOPMed  
222 using the WGSA pipeline (Liu *et al.* 2016). Since SKAT imputes missing genotypes by default by  
223 assigning mean genotype values (impute.method="fixed"), we chose to use low coverage  
224 genotypes instead of SKAT imputation, and hence, TOPMed freeze 8 DP0 variants with a VCF  
225 FILTER of PASS were included in the analysis. The function effectiveSize in the R package CODA  
226 (Plummer *et al.* 2006) was used to estimate the effective number of independent hypothesis  
227 tests for accurate Bonferroni multiple testing corrections. P-value thresholds for statistical  
228 significance and suggestive significance were defined as 0.05 and 1 divided by the effective  
229 number of tests, respectively (Duggal *et al.* 2008). If a region was suggestively significant, region-  
230 based analyses were repeated with functional variants and/or rare variants (MAF  $\leq$  0.01) to  
231 assess contribution of common, rare and/or functional variants. Region-based analyses using rare  
232 variants only were performed using SKAT-O (Lee *et al.* 2012). The WGSA annotation filters used  
233 to define functional variants are provided in File S1 (Supplementary Text 1). To study the  
234 contribution of individual variants to a region-based association p-value, drop-one variant  
235 analysis was performed by repeating the region-based analysis multiple times and dropping one  
236 variant only at a time.

## 237 *Functional annotations and prioritization of genetic variants*

238 The Hi-C Unifying Genomic Interrogator (HUGIN) (Ay *et al.* 2014; Martin, J. S. *et al.* 2017; Schmitt  
239 *et al.* 2016) was used to assign potential gene targets to each variant. HUGIN uses the Hi-C data  
240 generated from the primary human tissues from four donors used in the Roadmap Epigenomics  
241 Project (Schmitt *et al.* 2016). ENCODE annotations (ENCODE Project Consortium 2011; ENCODE  
242 Project Consortium 2012) were based on overlap of the variants with functional data downloaded  
243 from the UCSC Table Browser (Karolchik *et al.* 2004). These data included DNase I  
244 hypersensitivity peak clusters (hg38 wgEncodeRegDnaseClustered table), transcription factor  
245 ChIP-Seq clusters (hg38 encRegTfbsClustered table) and histone modification ChIP-Seq peaks  
246 (hg19 wgEncodeBroadHistone<cell type><histone>StdPk tables). For DNase I hypersensitivity  
247 and transcription factor binding sites, we focused on blood, bone marrow, lung and embryonic  
248 cells. For histone modification ChIP-Seq, we focused on H3K27ac and H3K4me3 modifications in  
249 human blood (GM12878), bone marrow (K562), lung fibroblast (NHLF), and embryonic stem cells  
250 (H1-hESC). LiftOver tool (Hinrichs *et al.* 2006) was used to convert genomic coordinates from  
251 hg19 to hg38. Candidate cis-regulatory elements (ccREs) were a subset of representative DNase  
252 hypersensitivity sites with epigenetic activity further supported by histone modification  
253 (H3K4me3 and H3K27ac) or CTCF-binding data from the ENCODE project. Overlap of variants with  
254 ccREs were detected using the Search Candidate cis-Regulatory Elements by ENCODE (SCREEN)  
255 web interface (ENCODE Project Consortium 2011; ENCODE Project Consortium 2012).

256 Prioritization of genetic variants was based on the presence of statistical, functional and/or  
257 bioinformatic evidence as described in the Diverse Convergent Evidence (DiCE) prioritization

258 framework (Ciesielski *et al.* 2014). The priority score of each variant was obtained by counting  
259 the number of statistical, functional, and/or bioinformatic evidences that support potential  
260 biological function for that variant.

### 261 *Replication of GWAS associations*

262 All replication analyses were performed in subjects with asthma. Replication of GWAS FEV<sub>1</sub>  
263 associations was attempted on TOPMed whole genome sequencing data generated from four  
264 cohorts. These cohorts included Puerto Rican (n=1,109) and Mexican American (n=649) children  
265 in the Genes-Environments and Admixture in Latino Americans (GALA II) study (Oh *et al.* 2012),  
266 African American adults in the Study of Asthma Phenotypes and Pharmacogenomic Interactions  
267 by Race-Ethnicity (SAPPHIRE, n=3,428) (Levin *et al.* 2014) and African American children in  
268 Genetics of Complex Pediatric Disorders (GCPD-A, n=1,464) study (Ong *et al.* 2013). Age, sex,  
269 height, controller medications and the first 5 PCs were used as covariates.

270 Additionally, replication of GWAS FEV<sub>1</sub> associations was attempted using data of black UK  
271 Biobank subjects who had asthma (n=627) while adjusting for age, sex, height and the first 5  
272 principal components. Asthma status was defined by ICD code or self-reported asthma. UK  
273 Biobank genotype data was generated on Affymetrix UK BiLEVE axiom or UK Biobank Axiom array  
274 and imputed into the Haplotype Reference Consortium, 1000G and UK 10K projects (Bycroft *et*  
275 *al.* 2018; Canela-Xandri *et al.* 2018). Additional details on the UK Biobank study and the  
276 replication procedures are available in File S1 (Supplementary Text 2).

277 *RNA sequencing and expression quantitative trait loci (eQTL) analysis*

278 Whole-transcriptome libraries of 370 nasal brushings from GALA II Puerto Rican children with  
279 asthma were constructed by using the Beckman Coulter FX automation system (Beckman Coulter,  
280 Fullerton, CA). Libraries were sequenced with the Illumina HiSeq 2500 system. Raw RNA-Seq  
281 reads were trimmed using Skewer (Jiang *et al.* 2014) and mapped to human reference genome  
282 hg38 using Hisat2 (Kim, D. *et al.* 2015). Reads mapped to genes were counted with htseq-count  
283 and using the UCSC hg38 GTF file as reference (Anders *et al.* 2015). Cis-expression quantitative  
284 trait locus (eQTL) analysis of *KITLG* was performed as described in the Genotype-Tissue  
285 Expression (GTEx) project version 7 protocol (GTEx Consortium *et al.* 2017) using age, sex, BMI,  
286 global African and European ancestries and 60 PEER factors as covariates.

287 *Gene-by-air-pollution interaction analysis*

288 We hypothesized that the effect of genetic variation on lung function in our study population  
289 may differ by the levels of exposure to SO<sub>2</sub> (Neophytou *et al.* 2016). To test for an interaction  
290 between a genetic variant and SO<sub>2</sub>, an additional multiplicative interaction term (variant x SO<sub>2</sub>  
291 exposure) was included in the original GWAS model (see Method Section “FEV<sub>1</sub> GWAS”). The SO<sub>2</sub>  
292 estimates used in the interaction analysis were first-year, past-year, and lifetime exposure to  
293 ambient of SO<sub>2</sub>, which were estimated as described previously (Neophytou *et al.* 2016). Briefly,  
294 we obtained regional ambient daily air pollution data from the U.S. Environmental Protection  
295 Agency Air Quality System. SO<sub>2</sub> estimates for the participant’s residential geographic coordinate  
296 were calculated as the inverse distance-squared weighted average from the four closest air  
297 pollution monitoring stations within 50 km of the participant’s residence. We estimated yearly

298 exposure at the reported residential address by averaging all available daily measures (daily  
299 average of 1-hour SO<sub>2</sub>) in a given year. If the participant had a change of residential address in a  
300 given year, we estimate yearly exposure as a time-weighted estimate based on the number of  
301 months spent at each different address in that year. Average lifetime exposures were estimated  
302 using all available yearly average estimates over the lifetime of the participant until the day of  
303 spirometry testing. Since not all pollutants were measured daily, there are location- and  
304 pollutant-dependent missing values. Residuals of FEV<sub>1</sub> were plotted against exposure to SO<sub>2</sub> and  
305 stratified by the number of copies of the minor allele. Residuals of FEV<sub>1</sub> were obtained as  
306 described in the Methods Section “FEV<sub>1</sub> GWAS”.

### 307 *Data availability*

308 Local institutional review boards approved the studies (IRB# 10-02877). All subjects and legal  
309 guardians provided written informed consent. TOPMed whole genome sequencing and  
310 phenotype data from SAGE II are available on dbGaP under accession number phs000921.v4.p1.  
311 Normalized gene count data for *KITLG* and supplemental materials are available at figshare.

## 312 RESULTS

### 313 *Novel lung function associations*

314 Subject characteristics of the 867 African American children with asthma included in this study  
315 are shown in Table 1, and the distribution of their FEV<sub>1</sub> measurements (mean = 2.56 L, standard  
316 deviation = 0.79 L) is in Figure S1. The CODA-adjusted statistical significance thresholds  $2.10 \times 10^{-7}$



317  $8$  and  $4.19 \times 10^{-7}$  were used as the genome-wide and suggestive significance thresholds,  
318 respectively. According to this threshold, one SNP in chromosome 12 (chr12:88846435,  
319 rs73429450, G>A) was associated with FEV<sub>1</sub>.res.rnorm (Figure 1,  $p = 9.01 \times 10^{-9}$ ,  $\beta = 0.801$ ) at  
320 genome-wide significance. The association between rs73429450 and lung function remained  
321 statistically significant when the association was repeated using untransformed FEV<sub>1</sub> ( $p = 1.26 \times$   
322  $10^{-8}$ ,  $\beta = 0.302$ ) as the outcome variable. The association between rs73429450 and lung function  
323 was suggestive using FEV<sub>1</sub>.perc.predicted ( $p = 1.69 \times 10^{-7}$ ,  $\beta = 0.100$ ). Twenty suggestive  
324 associations corresponding to 4 tag signals are reported in Supplementary File S2. None of the  
325 suggestive associations overlapped with any of the previously reported FEV<sub>1</sub>-associated loci.  
326 When considering only common variants and applying a p-value threshold of  $5.63 \times 10^{-5}$ , we  
327 found replicated in 6 out of 230 previously reported FEV<sub>1</sub> associations (Table S1). Our top FEV<sub>1</sub>  
328 association, rs73429450, did not overlap with any previously reported loci and it is a novel  
329 association with FEV<sub>1</sub> in this study population.

330 Secondary analysis that included covariates correcting for smoking status and number of smokers  
331 in the family showed that smoking-related factors were not significantly associated with FEV<sub>1</sub> in  
332 our pediatric SAGE cohort: using 657 out of 867 individuals with available smoking-related  
333 covariates, the FEV<sub>1</sub>.res.rnorm association p-values before and after including the smoking-  
334 related covariates were  $2.01 \times 10^{-6}$  and  $1.89 \times 10^{-6}$ . Both p-values of the covariates smoking status  
335 ( $p = 0.27$ ) and number of smokers in the family ( $p = 0.54$ ) were not significant.

336 Conditional analysis was performed on 45 variants with association  $p < 1 \times 10^{-4}$  located within 1  
337 Mb of the strongest association signal (rs73429450). Two weaker independent signals

338 (rs17016065, rs58475486) were identified (Table S2). None of the 45 variants showed association  
339 with FEV<sub>1.res.rnom</sub> in 251 SAGE II children without asthma (Table S3).

340 The minor allele frequency of rs73429450 in continental populations from the 1000 Genomes  
341 Project (1000G) is 3% in Africans (AFR) and < 1% in Admixed Americans (AMR), Europeans (EUR)  
342 and Asians (EAS and SAS) (1000 Genomes Project Consortium *et al.* 2015). Rs73429450 was not  
343 included on the Affymetrix LAT1 genotyping array where SAGE participants were previously  
344 genotyped. To determine if the rs73429450 association with FEV<sub>1</sub> was only identifiable using  
345 whole genome sequencing data, we attempted to reproduce our results by imputing the  
346 genotype of rs73429450 in 851 SAGE participants with available array data using 1000G phase 3  
347 (n = 2,504), HRC r1.1 (n = 32,470), CAAPA (n = 883) and TOPMed freeze 5 (n = 62,784) reference  
348 panels. Our results remained statistically significant when using the 1000G phase 3 (p = 4.97 x 10<sup>-</sup>  
349 <sup>8</sup>, β = 0.79, imputation R<sup>2</sup> = 0.95) and TOPMed freeze 5 (p = 1.22 x 10<sup>-8</sup>, β = 0.80, imputation R<sup>2</sup> =  
350 0.98) reference panels, but lost statistical significance when rs73429450 genotypes were  
351 imputed using the HRC (p = 4.35 x 10<sup>-7</sup>, β = 0.68, imputation R<sup>2</sup> = 0.94) and CAAPA (p = 1.95 x 10<sup>-</sup>  
352 <sup>7</sup>, β = 0.80, imputation R<sup>2</sup> = 0.71) reference panels.

353 Region-based association analysis including all variants conditioned on the association signal  
354 from rs73429450 was performed in its 1 Mb flanking region (chr12:87846435-89846435). No  
355 windows were significantly associated after Bonferroni multiple testing correction (p < 2.80 x 10<sup>-</sup>  
356 <sup>4</sup>, Figure S2), but 20 windows were suggestively associated with FEV<sub>1.res.rnorm</sub> (p < 5.60 x 10<sup>-3</sup>,  
357 Table S5). Two of 20 windows re-tested using only functional variants were suggestively  
358 significant (region 4 and 16). Both of these windows were no longer suggestively significant after

359 removing the common variants, indicating that association signal from these regions was mostly  
360 driven by common variants. Further investigation on region 16 using drop-one analysis on the 2  
361 rare and 1 common function variants confirmed the major contribution by the common variant,  
362 rs1895710, as shown by the major increase in p-value (Table S6). The signal was also slightly  
363 driven by the singleton, rs990979778. Drop-one analysis was not performed on region 4 because  
364 there were only 1 common and 1 rare variants.

365 A Hi-C assay couples a chromosome conformation capture (3C) assay with next-generation  
366 sequencing to capture long-range interactions in the genome. We identified a statistically  
367 significant long-range chromatin interaction between the GWAS peak and the KIT ligand (*KITLG*,  
368 also known as stem cell factor, *SCF*) gene in human fetal lung fibroblast cell line IMR90 (Table S7).  
369 The long-range interaction detected in human primary lung tissue was not significant, implying  
370 that the potential long-range interactions are specific to tissue type or developmental stage.

### 371 *Potential regulatory role of FEV<sub>1</sub>-associated variants on KITLG expression*

372 To further elucidate potential regulatory relationships between the GWAS association peak and  
373 *KITLG*, we analyzed whether variants in the peak were eQTL of *KITLG* in previously published  
374 whole blood RNA-Seq data available from the same study participants (Mak, Angel CY *et al.* 2016).  
375 The whole blood RNA-Seq data, however, did not yield evidence of expressed *KITLG*, consistent  
376 with results in GTEx. We subsequently used RNA-Seq data from nasal epithelial cells of 370 Puerto  
377 Rican children with asthma from the GALA II study, and found that five out of 45 variants were  
378 eQTL of *KITLG* (Table S8). While Puerto Ricans are a different population than African Americans,

379 they are both admixed populations with substantial African genetic ancestry, and therefore could  
380 share eQTLs. All five eQTLs corresponded to one signal in a region with strong linkage  
381 disequilibrium ( $r^2 > 0.8$ , Figure S3).

### 382 *Replication of genetic association with FEV<sub>1</sub>*

383 Subject characteristics of our four replication cohorts (SAPPHIRE, GCPD-A, UK Biobank and GALA  
384 II) are shown in Table S9. We attempted to replicate the association of the 45 SNPs in our primary  
385 FEV<sub>1</sub> GWAS in each cohort. We used 0.05 as the suggestive p-value threshold and 0.0167 as the  
386 Bonferroni-corrected p-value threshold after correcting for 3 independent signals (see  
387 conditional analysis in Results Section). A total of 20 variants were replicated at  $p < 0.05$  with  
388 consistent direction of effect in black UK Biobank participants; 14 variants in SAPPHIRE and 2  
389 variants in GCPD-A were significant but had an opposite direction of effect (Table S10).

390 We attempted to replicate the FEV<sub>1.res.rnorm</sub> association in Mexican American (n = 649) and  
391 Puerto Rican (n = 1,109) children with asthma from the GALA II study. In Mexican Americans, we  
392 excluded 19 variants with MAF < 0.1% and associations for the remaining 26 variants did not  
393 replicate (Table S11). In Puerto Ricans, the associations were not replicated (Table S11).

### 394 *Incorporating statistical and functional evidence for candidate variant prioritization*

395 We combined and summarized all functional evidence for the top 45 variants, along with eQTL  
396 findings from nasal epithelial RNA-Seq and replication results (Figure 2, Table 2 and S12). To  
397 facilitate interpretation of the variant association with FEV<sub>1</sub>, the effect sizes and p-values of both  
398 FEV<sub>1</sub> ( $\beta$  and  $p$ ) and FEV<sub>1.res.rnorm</sub> ( $\beta_{\text{norm}}$  and  $p_{\text{norm}}$ ) associations are also reported. CADD  
399 functional prediction score and ENCODE histone modification CHIP-Seq peaks in embryonic,

400 blood, bone marrow, and lung-related tissues were also examined but not reported because  
401 none of the variants had a CADD score greater than 10 and none overlapped with histone  
402 modification sites. Rs73440122 received the highest priority score of 3 based on replication in  
403 the UK Biobank, overlap with a DNase I hypersensitivity site in B-lymphoblastoid cells (GM12865)  
404 and overlap with an SPI1 binding site in acute promyelocytic leukemia cells. Eight other variants  
405 were prioritized with score > 2 or evidence of being an eQTL for *KITLG* in nasal epithelial cells  
406 (Table 2, score marked with ^ or # respectively). These nine candidate variants were selected for  
407 gene-by-air-pollution interaction analyses.

#### 408 *Gene-by-air-pollution interaction of rs58475486*

409 We previously found that first year of life and lifetime exposure to SO<sub>2</sub> were associated with FEV<sub>1</sub>  
410 in African American children (Neophytou *et al.* 2016). We investigated whether the effect of the  
411 nine prioritized genetic variants associated with lung function varied by SO<sub>2</sub> exposure (first year  
412 of life, past year, and lifetime exposure). Since the nine variants represent three independent  
413 signals (see conditional analysis in the Results Section), the Bonferroni-corrected p-value  
414 threshold was set to  $p = 0.0056$  (correction for nine tests; three signals and three exposure  
415 periods to SO<sub>2</sub>). We observed a single statistically significant interaction between the T allele of  
416 rs58475486 and past year exposure to SO<sub>2</sub> that was positively associated with FEV<sub>1</sub> ( $p = 0.003$ ,  $\beta$   
417 = 0.32, Table 3, Figure 3A). This interaction remains significant ( $p = 0.003$ ,  $\beta = 0.32$ ) in secondary  
418 analyses adjusted for smoking status or a multiplicative interaction term of rs58475486 and  
419 smoking status as additional covariates. Interestingly, six of the remaining eight variants also  
420 displayed interaction effects with past year exposure to SO<sub>2</sub> that were suggestively associated ( $p$

421 < 0.05) with FEV<sub>1</sub> (Table 3). We also found a suggestive interaction of the C allele of rs73440122  
422 with first year exposure to SO<sub>2</sub> that was associated with decreased FEV<sub>1</sub> ( $p = 0.045$ ,  $\beta = -0.32$ ,  
423 Figure 3B). The same allele also showed interaction with past year of exposure to SO<sub>2</sub> that was  
424 suggestively associated with FEV<sub>1</sub> in the opposite direction ( $p = 0.051$ ,  $\beta = 0.39$ ).

## 425 DISCUSSION

426 Variant rs73429450 (MAF = 0.030) was identified as the strongest association signal with FEV<sub>1</sub>.  
427 Each additional copy of the protective A allele of rs73429450 was associated with a 0.3 L increase  
428 of FEV<sub>1</sub>. We did not find any statistically significant contribution of rare variants to the association  
429 signal from a 1 Kb sliding window analyses in the 1 MB flanking region centered on rs73429450.  
430 We were surprised to identify a novel common variant (MAF = 0.030) associated with lung  
431 function using whole genome sequence data in a population that was previously analyzed for  
432 associations with lung function using genotype array data. Further investigation revealed that  
433 our discovered variant, rs73429450, was not captured by the LAT 1 genotyping array, and the  
434 association with lung function depended on the reference panel used to impute the variant into  
435 our population. More surprisingly, our statistically significant finding was only found to be  
436 suggestively significant using data imputed from the CAAPA reference panel ( $p = 1.95 \times 10^{-7}$ ,  $\beta =$   
437 0.80). Of the imputation reference panels that we assessed, CAAPA is one of the more relevant  
438 reference panels for our study population because it is based on African populations in the  
439 Americas. However, we note that the effect size estimated from CAAPA-imputed data was  
440 comparable to that generated from WGS data. While whole genome sequencing data is usually  
441 praised for enabling analysis of rare-variant contributions to phenotype variability, our results

442 show the utility of whole genome sequencing data for the reliable analysis of common variants  
443 as well in the absence of relevant imputation panels.

444 Although rs73429450 had the lowest p-value from our whole genome sequencing association  
445 analysis, we did not find the required amount of functional evidence to prioritize this marker for  
446 inclusion in downstream gene-by-air-pollution analyses. Another variant, rs73440122, was in  
447 moderate to strong linkage disequilibrium ( $r^2 = 0.76$ ) with rs7349450 and had a similar MAF  
448 (0.027) in our study population, but was only suggestively associated with FEV<sub>1</sub> in our association  
449 analysis ( $p = 2.08 \times 10^{-7}$ , Table2). In contrast to rs73429450, there were multiple lines of evidence  
450 suggesting the functional relevance of rs73440122: rs73440122 received the highest priority  
451 score based on its replicated FEV<sub>1</sub> association in black UK Biobank participants and overlap with  
452 ENCODE gene regulatory regions, making it one of the most likely drivers of FEV<sub>1</sub> variability  
453 among individuals, possibly mediated through *KITLG*.

454 Bioinformatic interrogation of rs73440122 revealed that the variant overlapped with a ccRE  
455 (SCREEN accession EH37E0279310), DNase I hypersensitivity site, and SPI1 ChIP-Seq clusters that  
456 were indicative of a candidate open chromatin gene regulatory region (Table S12). The binding  
457 evidence of SPI1 is highly relevant to the role of *KITLG* in type 2 inflammation (see below). Variant  
458 rs73440122 is located in a region that physically interacted with *KITLG* based on Hi-C data in fetal  
459 lung fibroblast cells. Additionally, five neighboring FEV<sub>1</sub> associated variants were identified as  
460 eQTLs of *KITLG*, although they appeared to be an independent signal ( $r^2 < 0.2$ ). Overall, these  
461 results support regulatory interactions between our novel locus and *KITLG*.

462 Atopic or type 2 high asthma is the most common form of asthma in children (Comberiati *et al.*  
463 2017). *KITLG*, more commonly known as stem cell factor (*SCF*), is a ligand of the KIT tyrosine  
464 kinase receptor. It plays an important role in type 2 inflammation in atopic asthma, especially in  
465 inflammatory processes mediated through mast cells, IgE and group 2 innate lymphoid cells (Da  
466 Silva and Frossard. 2005; Da Silva *et al.* 2006; Fonseca *et al.* 2019; Oliveira and Lukacs. 2003) . In  
467 the airways, *KITLG* is expressed in bronchial epithelial cells, lung fibroblasts, bronchial smooth  
468 muscle cells, endothelial cells, peripheral blood eosinophils, dendritic cells and mast cells (Hsieh  
469 *et al.* 2005; Kassel *et al.* 1999; Oriss *et al.* 2014; Valent *et al.* 1992; Wen *et al.* 1996). *KITLG* is a  
470 major growth factor of mast cells (Reviewed in Broudy 1997; Da Silva *et al.* 2006; Galli *et al.* 1994;  
471 Galli *et al.* 1995). It promotes recruitment of mast cell progenitors into tissues (Reviewed in  
472 Oliveira and Lukacs. 2003), prevents mast cell apoptosis (Iemura *et al.* 1994; Mekori *et al.* 1993)  
473 and promotes release of inflammatory mediators such as proteases, histamine, chemotactic  
474 factors, cytokines (Reviewed in Amin 2012; Borish and Joseph. 1992). While *KITLG* promotes the  
475 production of cytokines like IL-13 upon IgE-receptor crosslinking on the surface of mast cells  
476 (Kobayashi *et al.* 1998), IL-13 was also reported to up-regulate *KITLG* (Rochman *et al.* 2015).  
477 Consistent with the critical role of *KITLG* for mast cells and type 2 inflammation, we found our  
478 prioritized variant, rs73440122, overlapped with a SPI1 (aka PU.1) ChIP-Seq cluster. The  
479 transcription factor SPI1 was demonstrated in SPI1 knockout mice to be necessary for the  
480 development of B cells, T cells, neutrophils, macrophages, dendritic cells, and mast cells  
481 (Anderson *et al.* 2000; Guerriero *et al.* 2000; McKercher *et al.* 1996; Scott *et al.* 1994; Scott *et al.*  
482 1997; Walsh *et al.* 2002). It plays an essential role in macrophage differentiation in asthmatic and



483 other allergic inflammation (Qian *et al.* 2015; Yashiro *et al.* 2019). It was also shown to regulate  
484 the cell fate between mast cells and monocytes (Ito *et al.* 2005; Ito *et al.* 2009; Nishiyama,  
485 Nishiyama, Ito, Masaki, Maeda *et al.* 2004; Nishiyama, Nishiyama, Ito, Masaki, Masuoka *et al.*  
486 2004). The presence of a SPI1 binding site in a candidate regulatory region of KITLG is therefore  
487 highly relevant given the critical role of KITLG in mast cell survival and activation.

488 Higher levels of KITLG (Al-Muhsen *et al.* 2004; Da Silva *et al.* 2006; Tayel *et al.* 2017) and an  
489 increased number of mast cells in the lung (Cruse and Bradding. 2016; Fajt and Wenzel. 2013;  
490 Mendez-Enriquez and Hallgren. 2019) were detected in individuals with asthma. The percentage  
491 of a subpopulation of circulating blood mast cell progenitors (Lin<sup>+</sup> CD34<sup>hi</sup> CD117<sup>int/hi</sup> FcεRI<sup>+</sup>) was  
492 higher in individuals with a reduced lung function (Dahlin *et al.* 2016). These findings suggested  
493 that higher *KITLG* expression and/or number of mast cells may be a contributing factor to lower  
494 lung function. This notion was inconsistent with the association of our novel locus with higher  
495 *KITLG* expression and increased lung function in SAGE II children with asthma. Interestingly, a  
496 study of 20 subjects with severe asthma found that increased in the number of chymase-positive  
497 mast cells in the small airway was associated with increased in lung function (Balzar *et al.* 2005).  
498 Overall, while there is still controversy on the direction of effect, previous findings support the  
499 association of our novel *KITLG* locus with lung function, especially in patients with allergic asthma.  
500 Our novel locus likely represents part of a complex regulatory mechanism that modulates  
501 immune cell differentiation, survival, and activation in highly cell-specific and context-dependent  
502 manners. Further studies are required to study how this locus is regulated in different airway and  
503 immune cells to affect lung function outcome in the context of asthma.

504 GxE interactions likely account for a portion of the “missing” heritability of many complex  
505 phenotypes (Moore and Williams. 2009). We previously found that lung function in SAGE II  
506 participants was associated with first year of life and lifetime exposures to SO<sub>2</sub> (1.66% decrease  
507 [95% CI = -2.92 to -0.37] for first year of life and 5.30% decrease [95% CI = -8.43 to -2.06] for  
508 lifetime exposures in FEV<sub>1</sub> per 1 ppb increases in SO<sub>2</sub>) (Neophytou *et al.* 2016). We hypothesized  
509 that a significant portion of the heritability of lung function was due in part to gene-by-air-  
510 pollution (SO<sub>2</sub>) interaction effects. The interaction between rs58475486 and past year exposure  
511 to SO<sub>2</sub> that was significantly associated with lung function supports our hypothesis. The T allele  
512 of rs58475486 is common (8-14%) in African populations and showed a protective effect on lung  
513 function in the presence of past year SO<sub>2</sub> exposure. SNP rs58475486 is located in a ccRE (SCREEN  
514 accession EH37E0279296) and a FOXA1 binding site in the A549 lung adenocarcinoma cell line.  
515 FOXA1 has a known compensatory role with FOXA2 during lung morphogenesis in mice (Wan *et*  
516 *al.* 2005). Deletion of both FOXA1 and FOXA2 inhibited cell proliferation, epithelial cell  
517 differentiation, and branching morphogenesis in fetal lung tissue. Further functional validation  
518 on the effect of rs58475486 on binding affinity of FOXA1 is necessary to confirm whether the role  
519 of FOXA1 in this ccRE is important for *KITLG* regulatory and lung function.

520 The higher frequency of the protective alleles of both rs73440122 and rs58465486 in African  
521 populations appears to contradict previous findings that African ancestry was associated with  
522 lower lung function (Kumar *et al.* 2010). One possible explanation for this seeming inconsistency  
523 is that FEV<sub>1</sub> is a complex trait whose variation is influenced by many genetic variants of small to  
524 moderate effect sizes whose influence on lung function may vary by exposure to environmental

525 factors. We found suggestive evidence that the interaction between rs73440122 and first year  
526 exposure to SO<sub>2</sub> reverses the positive association of rs73440122 with lung function to a negative  
527 one (Table 3). When assessed independently, our genetic association analysis showed that the  
528 protective A allele of rs73440122 was associated with higher lung function. However, with  
529 increasing levels of SO<sub>2</sub> exposure in the first year of life, increasing copies of the A allele of  
530 rs73440122 were associated with decreased lung function. Air pollution is known to negatively  
531 impact lung function, and we have previously shown that the deleterious effects of air pollution  
532 on lung phenotypes may be significantly increased in African American children compared to  
533 other populations experiencing the same amount of exposure (Nishimura *et al.* 2013). It has also  
534 been reported that Latino and African American populations often live in neighborhoods with  
535 high levels of air pollution (Mott 1995). The increased susceptibility to negative pulmonary effects  
536 from air pollution exposure coupled with the disproportionate exposure to air pollution  
537 experienced by the African American population may also contribute to the lower lung function  
538 seen in this population despite the presence of protective alleles. The overlap of the SPI1 binding  
539 site with rs73440122 further supports gene-by-SO<sub>2</sub> interaction at this locus, since SPI1 played a  
540 critical role in the development of type 2 inflammation in the airways through macrophage  
541 polarization (Qian *et al.* 2015). We noted that the rs73440122 A allele also showed an interaction  
542 approaching suggestive threshold with past year exposure to SO<sub>2</sub> that was positively associated  
543 with FEV<sub>1</sub>. The difference is not surprising because age of exposure may significantly impact the  
544 effect of air pollution on lung function (Reviewed in Usemann *et al.* 2019) . Further studies are  
545 required to better understand the effect of this suggestive interaction on lung function.

546 One strength of this study is the interrogation of independent lung function associated signals at  
547 our novel locus. We identified evidence of three independent signals: the replicated signal that  
548 showed evidence of regulatory functions (an open chromatin region with a SPI1/PU.1 binding  
549 site), one signal that showed a statistically significant gene-by-SO<sub>2</sub> interaction on lung function,  
550 and one signal that represents to *KITLG* eQTLs in the nasal epithelial cells together with suggestive  
551 gene-by-SO<sub>2</sub> interaction. Our results demonstrated a glimpse of the complicated genetic  
552 architecture behind complex traits.

553 One limitation of this study is that the FEV<sub>1</sub> genetic association and the eQTL analyses with *KITLG*  
554 were performed in different populations due to data availability constraints. Although we did not  
555 have RNA-Seq data from lung tissues from our study subjects, we previously demonstrated that  
556 there is a high degree of overlap in gene expression profiles between nasal and bronchial  
557 epithelial cells (Poole *et al.* 2014). The direction of effect of the association was the same in GALA  
558 II Puerto Rican children with asthma but not statistically significant. This may in part due to the  
559 significantly lower African Ancestry in Puerto Ricans compared to African Americans.

560 We replicated 20 of 45 variants in black UK Biobank subjects and observed conflicting “flip-flop”  
561 associations in African Americans from the SAPPHIRE and GCPD-A studies. In the past, flip-flop  
562 associations were deemed as spurious results. Traditional association testing approach studies  
563 the effect of each variant on phenotype independently and increases the chance of flip-flop  
564 associations detected between studies. Differences in study design, sampling variation that leads  
565 to variation in LD patterns, and lack of consideration of other disease influencing genetic and/or  
566 environmental factors are all potential causes of flip-flop associations (Kraft *et al.* 2009; Lin *et al.*

567 2007). Hence, it is not surprising to observe flip-flop associations when gene and environment  
568 interactions were detected at our FEV<sub>1</sub> GWAS locus. It was previously shown that flip-flop  
569 associations can occur between and within populations even in the presence of a genuine genetic  
570 effect (Kraft *et al.* 2009; Lin *et al.* 2007). Further functional analysis is thus required to validate  
571 the relationship between the candidate variants, *KITLG* and FEV<sub>1</sub>. This may include reporter  
572 assays to validate potential enhancer or repressor activity and CRISPR-based editing assays to  
573 validate the regulatory role of the candidate variants on *KITLG*. Although literature exists  
574 describing KIT signaling for lung function in mice (Lindsey *et al.* 2011), additional knockout  
575 experiments in a model animal system may be necessary to study how *KITLG* contributed to  
576 variation in lung function.

577 The average concentration of ambient SO<sub>2</sub> exposure in our participants (Table 1) was lower than  
578 the National Ambient Air Quality Standards. It is possible that SO<sub>2</sub> acted as a surrogate for other  
579 unmeasured toxic pollutants emitted from local point sources. Major sources of SO<sub>2</sub> in San  
580 Francisco Bay Area during the recruitment years of 2006 to 2011 include airports, petroleum  
581 refineries, gas and oil plants, calcined petroleum coke plants, electric power plants, cement  
582 manufacturing factories, chemical plants, and landfills (United States Environmental Protection  
583 Agency 2008; United States Environmental Protection Agency 2011). The Environmental  
584 Protection Agency's national emissions inventory data also showed that these facilities emit  
585 Volatile Organic Compounds, heavy metals (lead, mercury, chromium, arsenic), formaldehyde,  
586 ethyl benzene, acrolein, 1,3-butadiene, 1,4-dichlorobenzene, and tetrachloroethylene into the  
587 air along with SO<sub>2</sub>. These chemicals are highly toxic and inhaling even a small amount may

588 contribute to poor lung function. Another possibility is that exposure to SO<sub>2</sub> captured  
589 unmeasured confounding socioeconomic factors.

590 This study identified a novel protective allele for lung function in African American children with  
591 asthma. The protective association with lung function intensified with increased past year  
592 exposure to SO<sub>2</sub>. Our findings showcase the complexity of the relationship between genetic and  
593 environmental factors impacting variation in FEV<sub>1</sub>, highlights the utility of WGS data for genetic  
594 research of complex phenotypes, and underscores the importance of including diverse study  
595 populations in our exploration of the genetic architecture underlying lung function.

## 596 ACKNOWLEDGEMENTS

597 The Genes-Environments and Admixture in Latino Americans (GALA II) Study, the Study of African  
598 Americans, Asthma, Genes and Environments (SAGE) Study and E.G.B. were supported by the  
599 Sandler Family Foundation, the American Asthma Foundation, the RWJF Amos Medical Faculty  
600 Development Program, the Harry Wm. and Diana V. Hind Distinguished Professor in  
601 Pharmaceutical Sciences II, the National Heart, Lung, and Blood Institute (NHLBI) [R01HL117004,  
602 R01HL128439, R01HL135156, X01HL134589]; the National Institute of Environmental Health  
603 Sciences [R01ES015794]; the National Institute on Minority Health and Health Disparities  
604 (NIMHD) [P60MD006902, R01MD010443], the National Human Genome Research Institute  
605 [U01HG009080] and the Tobacco-Related Disease Research Program [24RT-0025]. MJW was  
606 supported by the NHLBI [K01HL140218]. JJ and BEH were supported by the NHLBI [R01HL133433,  
607 R01HL141992]. KLK was supported by the NHLBI [R01HL135156-S1], the UCSF Bakar Institute, the  
608 Gordon and Betty Moore Foundation [GBMF3834], and the Alfred P. Sloan Foundation [2013-10-

609 27] grant to UC Berkeley through the Moore-Sloan Data Science Environment Initiative. ACW was  
610 supported by the Eunice Kennedy Shriver National Institute of Child Health and Human  
611 Development [1R01HD085993-01].

612 The SAPPHIRE study was supported by the Fund for Henry Ford Hospital, the American Asthma  
613 Foundation, the NHLBI [R01HL118267, R01HL141485, X01HL134589], the National Institute of  
614 Allergy and Infectious Diseases [R01AI079139], and the National Institute of Diabetes and  
615 Digestive and Kidney Diseases [R01DK113003].

616 The GCPD-A study was supported by an Institutional award from the Children's Hospital of  
617 Philadelphia and by the NHLBI [X01HL134589].

618 Part of this research was conducted using the UK Biobank Resource under Application Number  
619 40375. We would like to thank UK Biobank participants and researchers who contributed or  
620 collected data.

621 Whole genome sequencing (WGS) for the Trans-Omics in Precision Medicine (TOPMed) program  
622 was supported by the National Heart, Lung and Blood Institute (NHLBI). WGS for "NHLBI TOPMed:  
623 Gene-Environment, Admixture and Latino Asthmatics Study" (phs000920) and "NHLBI TOPMed:  
624 Study of African Americans, Asthma, Genes and Environments" (phs000921) was performed at  
625 the New York Genome Center (3R01HL117004-02S3) and the University of Washington  
626 Northwest Genomics Center (HHSN268201600032I). WGS for "NHLBI TOPMed: Study of Asthma  
627 Phenotypes & Pharmacogenomic Interactions by Race-Ethnicity" (phs001467) and "Genetics of  
628 Complex Pediatric Disorders - Asthma" (phs001661) was performed at the University of

629 Washington Northwest Genomics Center (HHSN268201600032I). Centralized read mapping and  
630 genotype calling, along with variant quality metrics and filtering were provided by the TOPMed  
631 Informatics Research Center (3R01HL-117626-02S1; contract HHSN268201800002I). Phenotype  
632 harmonization, data management, sample-identity QC, and general study coordination were  
633 provided by the TOPMed Data Coordinating Center (3R01HL-120393-02S1; contract  
634 HHSN268201800001I). We gratefully acknowledge the studies and participants who provided  
635 biological samples and data for TOPMed.

636 WGS of part of GALA II was performed by New York Genome Center under The Centers for  
637 Common Disease Genomics of the Genome Sequencing Program (GSP) Grant (UM1 HG008901).  
638 The GSP Coordinating Center (U24 HG008956) contributed to cross-program scientific initiatives  
639 and provided logistical and general study coordination. GSP is funded by the National Human  
640 Genome Research Institute, the National Heart, Lung, and Blood Institute, and the National Eye  
641 Institute.

642 The TOPMed imputation panel was supported by the NHLBI and TOPMed study investigators who  
643 contributed data to the reference panel. The panel was constructed and implemented by the  
644 TOPMed Informatics Research Center at the University of Michigan (3R01HL-117626-02S1;  
645 contract HHSN268201800002I). The TOPMed Data Coordinating Center (3R01HL-120393-02S1;  
646 contract HHSN268201800001I) provided additional data management, sample identity checks,  
647 and overall program coordination and support. We gratefully acknowledge the studies and  
648 participants who provided biological samples and data for TOPMed.



649 The authors wish to acknowledge the following GALA II and SAGE study collaborators: Shannon  
650 Thyne, UCSF; Harold J. Farber, Texas Children's Hospital; Denise Serebrisky, Jacobi Medical Center;  
651 Rajesh Kumar, Lurie Children's Hospital of Chicago; Emerita Brigino-Buenaventura, Kaiser  
652 Permanente; Michael A. LeNoir, Bay Area Pediatrics; Kelley Meade, UCSF Benioff Children's  
653 Hospital, Oakland; William Rodríguez-Cintrón, VA Hospital, Puerto Rico; Pedro C. Ávila,  
654 Northwestern University; Jose R. Rodríguez-Santana, Centro de Neumología Pediátrica; Luisa N.  
655 Borrell, City University of New York; Adam Davis, UCSF Benioff Children's Hospital, Oakland;  
656 Saunak Sen, University of Tennessee.

657 The authors acknowledge the families and patients for their participation and thank the  
658 numerous health care providers and community clinics for their support and participation in  
659 GALA II and SAGE. In particular, the authors thank the recruiters who obtained the data: Duanny  
660 Alva, MD; Gaby Ayala-Rodríguez; Lisa Caine, RT; Elizabeth Castellanos; Jaime Colón; Denise  
661 DeJesus; Blanca López; Brenda López, MD; Louis Martos; Vivian Medina; Juana Olivo; Mario  
662 Peralta; Esther Pomares, MD; Jihan Quraishi; Johanna Rodríguez; Shahdad Saeedi; Dean Soto;  
663 and Ana Taveras.

664 The authors thank María Pino-Yanes for providing feedback on this study and Thomas W  
665 Blackwell for providing critical review on this manuscript.

666 The content is solely the responsibility of the authors and does not necessarily represent the  
667 official views of the National Institutes of Health.

668

669 LITERATURE CITED

- 670 1000 Genomes Project Consortium, A. Auton, L. D. Brooks, R. M. Durbin, E. P. Garrison *et al*,  
671 2015 A global reference for human genetic variation. *Nature* **526**: 68-74.
- 672 Akinbami, L. J., 2015 *Asthma Prevalence, Health Care use and Mortality: United States, 2003-05*.  
673 [Online] Available at: <http://www.cdc.gov/nchs/data/hestat/asthma03-05/asthma03-05.htm>.  
674 [Accessed 2020 Jan 8].
- 675 Akinbami, L. J., J. E. Moorman, A. E. Simon and K. C. Schoendorf, 2014 Trends in racial  
676 disparities for asthma outcomes among children 0 to 17 years, 2001-2010. *J. Allergy Clin.*  
677 *Immunol.* **134**: 547-553.e5.
- 678 Alexander, D. H., J. Novembre and K. Lange, 2009 Fast model-based estimation of ancestry in  
679 unrelated individuals. *Genome Res.* **19**: 1655-1664.
- 680 Al-Muhsen, S. Z., G. Shablovsky, R. Olivenstein, B. Mazer and Q. Hamid, 2004 The expression of  
681 stem cell factor and c-kit receptor in human asthmatic airways. *Clin. Exp. Allergy* **34**: 911-916.
- 682 Amin, K., 2012 The role of mast cells in allergic inflammation. *Respir. Med.* **106**: 9-14.
- 683 Anders, S., P. T. Pyl and W. Huber, 2015 HTSeq--a python framework to work with high-  
684 throughput sequencing data. *Bioinformatics* **31**: 166-169.

- 685 Anderson, K. L., H. Perkin, C. D. Surh, S. Venturini, R. A. Maki *et al*, 2000 Transcription factor  
686 PU.1 is necessary for development of thymic and myeloid progenitor-derived dendritic cells. *J.*  
687 *Immunol.* **164**: 1855-1861.
- 688 Ay, F., T. L. Bailey and W. S. Noble, 2014 Statistical confidence estimation for hi-C data reveals  
689 regulatory chromatin contacts. *Genome Res.* **24**: 999-1011.
- 690 Balzar, S., H. W. Chu, M. Strand and S. Wenzel, 2005 Relationship of small airway chymase-  
691 positive mast cells and lung function in severe asthma. *Am. J. Respir. Crit. Care Med.* **171**: 431-  
692 439.
- 693 Barraza-Villarreal, A., J. Sunyer, L. Hernandez-Cadena, M. C. Escamilla-Nunez, J. J. Sienra-Monge  
694 *et al*, 2008 Air pollution, airway inflammation, and lung function in a cohort study of mexico city  
695 schoolchildren. *Environ. Health Perspect.* **116**: 832-838.
- 696 Barrett, J. C., B. Fry, J. Maller and M. J. Daly, 2005 Haploview: Analysis and visualization of LD  
697 and haplotype maps. *Bioinformatics* **21**: 263-265.
- 698 Borish, L., and B. Z. Joseph, 1992 Inflammation and the allergic response. *Med. Clin. North Am.*  
699 **76**: 765-787.
- 700 Broudy, V. C., 1997 Stem cell factor and hematopoiesis. *Blood* **90**: 1345-1364.
- 701 Brunekreef, B., and S. T. Holgate, 2002 Air pollution and health. *Lancet* **360**: 1233-1242.

702 Buniello, A., J. A. L. MacArthur, M. Cerezo, L. W. Harris, J. Hayhurst *et al*, 2019 The NHGRI-EBI  
703 GWAS catalog of published genome-wide association studies, targeted arrays and summary  
704 statistics 2019. *Nucleic Acids Res.* **47**: D1005-D1012.

705 Bycroft, C., C. Freeman, D. Petkova, G. Band, L. T. Elliott *et al*, 2018 The UK biobank resource  
706 with deep phenotyping and genomic data. *Nature* **562**: 203-209.

707 Canela-Xandri, O., K. Rawlik and A. Tenesa, 2018 An atlas of genetic associations in UK biobank.  
708 *Nat. Genet.* **50**: 1593-1599.

709 Carlson, C. S., T. C. Matise, K. E. North, C. A. Haiman, M. D. Fesinmeyer *et al*, 2013  
710 Generalization and dilution of association results from european GWAS in populations of non-  
711 european ancestry: The PAGE study. *PLoS Biol.* **11**: e1001661.

712 Chang, C. C., C. C. Chow, L. C. Tellier, S. Vattikuti, S. M. Purcell *et al*, 2015 Second-generation  
713 PLINK: Rising to the challenge of larger and richer datasets. *Gigascience* **4**: 7-8. eCollection  
714 2015.

715 Chatterjee, S., and N. Das, 1995 Lung function in indian twin children: Comparison of genetic  
716 versus environmental influence. *Ann. Hum. Biol.* **22**: 289-303.

717 Chen, Y., S. L. Horne, D. C. Rennie and J. A. Dosman, 1996 Segregation analysis of two lung  
718 function indices in a random sample of young families: The humboldt family study. *Genet.*  
719 *Epidemiol.* **13**: 35-47.

- 720 Ciesielski, T. H., S. A. Pendergrass, M. J. White, N. Kodaman, R. S. Sobota *et al*, 2014 Diverse  
721 convergent evidence in the genetic analysis of complex disease: Coordinating omic, informatic,  
722 and experimental evidence to better identify and validate risk factors. *BioData Min.* **7**: 10-10.  
723 eCollection 2014.
- 724 Comberiat, P., M. E. Di Cicco, S. D'Elios and D. G. Peroni, 2017 How much asthma is atopic in  
725 children? *Front. Pediatr.* **5**: 122.
- 726 Conomos, M. P., M. B. Miller and T. A. Thornton, 2015 Robust inference of population structure  
727 for ancestry prediction and correction of stratification in the presence of relatedness. *Genet.*  
728 *Epidemiol.* **39**: 276-293.
- 729 Conomos, M. P., A. P. Reiner, B. S. Weir and T. A. Thornton, 2016 Model-free estimation of  
730 recent genetic relatedness. *Am. J. Hum. Genet.* **98**: 127-148.
- 731 Cruse, G., and P. Bradding, 2016 Mast cells in airway diseases and interstitial lung disease. *Eur.*  
732 *J. Pharmacol.* **778**: 125-138.
- 733 Da Silva, C. A., and N. Frossard, 2005 Regulation of stem cell factor expression in inflammation  
734 and asthma. *Mem. Inst. Oswaldo Cruz* **100 Suppl 1**: 145-151.
- 735 Da Silva, C. A., L. Reber and N. Frossard, 2006 Stem cell factor expression, mast cells and  
736 inflammation in asthma. *Fundam. Clin. Pharmacol.* **20**: 21-39.

- 737 Dahlin, J. S., A. Malinowski, H. Ohrvik, M. Sandelin, C. Janson *et al*, 2016 Lin- CD34hi  
738 CD117int/hi FcεRI+ cells in human blood constitute a rare population of mast cell  
739 progenitors. *Blood* **127**: 383-391.
- 740 Das, S., L. Forer, S. Schonherr, C. Sidore, A. E. Locke *et al*, 2016 Next-generation genotype  
741 imputation service and methods. *Nat. Genet.* **48**: 1284-1287.
- 742 Duggal, P., E. M. Gillanders, T. N. Holmes and J. E. Bailey-Wilson, 2008 Establishing an adjusted  
743 p-value threshold to control the family-wide type 1 error in genome wide association studies.  
744 *BMC Genomics* **9**: 516-516.
- 745 ENCODE Project Consortium, 2012 An integrated encyclopedia of DNA elements in the human  
746 genome. *Nature* **489**: 57-74.
- 747 ENCODE Project Consortium, 2011 A user's guide to the encyclopedia of DNA elements  
748 (ENCODE). *PLoS Biol.* **9**: e1001046.
- 749 Fajt, M. L., and S. E. Wenzel, 2013 Mast cells, their subtypes, and relation to asthma  
750 phenotypes. *Ann. Am. Thorac. Soc.* **10 Suppl**: 158.
- 751 Fonseca, W., A. J. Rasky, C. Ptaschinski, S. H. Morris, S. K. K. Best *et al*, 2019 Group 2 innate  
752 lymphoid cells (ILC2) are regulated by stem cell factor during chronic asthmatic disease.  
753 *Mucosal Immunol.* **12**: 445-456.

- 754 Galli, S. J., K. M. Zsebo and E. N. Geissler, 1994 The kit ligand, stem cell factor. *Adv. Immunol.*  
755 **55**: 1-96.
- 756 Galli, S. J., M. Tsai, B. K. Wershil, S. Y. Tam and J. J. Costa, 1995 Regulation of mouse and human  
757 mast cell development, survival and function by stem cell factor, the ligand for the c-kit  
758 receptor. *Int. Arch. Allergy Immunol.* **107**: 51-53.
- 759 GTEx Consortium, Laboratory, Data Analysis & Coordinating Center (LDACC)-Analysis Working  
760 Group, Statistical Methods groups-Analysis Working Group, Enhancing GTEx (eGTEx) groups,  
761 NIH Common Fund *et al*, 2017 Genetic effects on gene expression across human tissues. *Nature*  
762 **550**: 204-213.
- 763 Guerriero, A., P. B. Langmuir, L. M. Spain and E. W. Scott, 2000 PU.1 is required for myeloid-  
764 derived but not lymphoid-derived dendritic cells. *Blood* **95**: 879-885.
- 765 Hankinson, J. L., J. R. Odencrantz and K. B. Fedan, 1999 Spirometric reference values from a  
766 sample of the general U.S. population. *Am. J. Respir. Crit. Care Med.* **159**: 179-187.
- 767 Hinrichs, A. S., D. Karolchik, R. Baertsch, G. P. Barber, G. Bejerano *et al*, 2006 The UCSC genome  
768 browser database: Update 2006. *Nucleic Acids Res.* **34**: 590.
- 769 Hsieh, F. H., P. Sharma, A. Gibbons, T. Goggans, S. C. Erzurum *et al*, 2005 Human airway  
770 epithelial cell determinants of survival and functional phenotype for primary human mast cells.  
771 *Proc. Natl. Acad. Sci. U. S. A.* **102**: 14380-14385.

- 772 Hukkinen, M., J. Kaprio, U. Broms, A. Viljanen, D. Kotz *et al*, 2011 Heritability of lung function: A  
773 twin study among never-smoking elderly women. *Twin Res. Hum. Genet.* **14**: 401-407.
- 774 Iemura, A., M. Tsai, A. Ando, B. K. Wershil and S. J. Galli, 1994 The c-kit ligand, stem cell factor,  
775 promotes mast cell survival by suppressing apoptosis. *Am. J. Pathol.* **144**: 321-328.
- 776 Ierodiakonou, D., A. Zanobetti, B. A. Coull, S. Melly, D. S. Postma *et al*, 2016 Ambient air  
777 pollution, lung function, and airway responsiveness in asthmatic children. *J. Allergy Clin.*  
778 *Immunol.* **137**: 390-399.
- 779 Ionita-Laza, I., S. Lee, V. Makarov, J. D. Buxbaum and X. Lin, 2013 Sequence kernel association  
780 tests for the combined effect of rare and common variants. *Am. J. Hum. Genet.* **92**: 841-853.
- 781 Ito, T., C. Nishiyama, M. Nishiyama, H. Matsuda, K. Maeda *et al*, 2005 Mast cells acquire  
782 monocyte-specific gene expression and monocyte-like morphology by overproduction of PU.1.  
783 *J. Immunol.* **174**: 376-383.
- 784 Ito, T., C. Nishiyama, N. Nakano, M. Nishiyama, Y. Usui *et al*, 2009 Roles of PU.1 in monocyte-  
785 and mast cell-specific gene regulation: PU.1 transactivates CIITA pIV in cooperation with IFN-  
786 gamma. *Int. Immunol.* **21**: 803-816.
- 787 Jiang, H., R. Lei, S. W. Ding and S. Zhu, 2014 Skewer: A fast and accurate adapter trimmer for  
788 next-generation sequencing paired-end reads. *BMC Bioinformatics* **15**: 182-182.



- 789 Johnson, J. D., and W. M. Theurer, 2014 A stepwise approach to the interpretation of  
790 pulmonary function tests. *Am. Fam. Physician* **89**: 359-366.
- 791 Karolchik, D., A. S. Hinrichs, T. S. Furey, K. M. Roskin, C. W. Sugnet *et al*, 2004 The UCSC table  
792 browser data retrieval tool. *Nucleic Acids Res.* **32**: 493.
- 793 Kassel, O., F. Schmidlin, C. Duvernelle, B. Gasser, G. Massard *et al*, 1999 Human bronchial  
794 smooth muscle cells in culture produce stem cell factor. *Eur. Respir. J.* **13**: 951-954.
- 795 Kim, D., B. Langmead and S. L. Salzberg, 2015 HISAT: A fast spliced aligner with low memory  
796 requirements. *Nat. Methods* **12**: 357-360.
- 797 Kim, M. S., K. P. Patel, A. K. Teng, A. J. Berens and J. Lachance, 2018 Genetic disease risks can be  
798 misestimated across global populations. *Genome Biol.* **19**: 179-7.
- 799 Kobayashi, H., Y. Okayama, T. Ishizuka, R. Pawankar, C. Ra *et al*, 1998 Production of IL-13 by  
800 human lung mast cells in response to fcepsilon receptor cross-linkage. *Clin. Exp. Allergy* **28**:  
801 1219-1227.
- 802 Kraft, P., E. Zeggini and J. P. Ioannidis, 2009 Replication in genome-wide association studies.  
803 *Stat. Sci.* **24**: 561-573.
- 804 Kumar, R., M. A. Seibold, M. C. Aldrich, L. K. Williams, A. P. Reiner *et al*, 2010 Genetic ancestry  
805 in lung-function predictions. *N. Engl. J. Med.* **363**: 321-330.

- 806 Lee, S., M. J. Emond, M. J. Bamshad, K. C. Barnes, M. J. Rieder *et al*, 2012 Optimal unified  
807 approach for rare-variant association testing with application to small-sample case-control  
808 whole-exome sequencing studies. *Am. J. Hum. Genet.* **91**: 224-237.
- 809 Levin, A. M., Y. Wang, K. E. Wells, B. Padhukasahasram, J. J. Yang *et al*, 2014 Nocturnal asthma  
810 and the importance of race/ethnicity and genetic ancestry. *Am. J. Respir. Crit. Care Med.* **190**:  
811 266-273.
- 812 Li, X., G. A. Hawkins, E. J. Ampleford, W. C. Moore, H. Li *et al*, 2013 Genome-wide association  
813 study identifies TH1 pathway genes associated with lung function in asthmatic patients. *J.*  
814 *Allergy Clin. Immunol.* **132**: 313-20.e15.
- 815 Liao, S. Y., X. Lin and D. C. Christiani, 2014 Genome-wide association and network analysis of  
816 lung function in the framingham heart study. *Genet. Epidemiol.* **38**: 572-578.
- 817 Lin, P. I., J. M. Vance, M. A. Pericak-Vance and E. R. Martin, 2007 No gene is an island: The flip-  
818 flop phenomenon. *Am. J. Hum. Genet.* **80**: 531-538.
- 819 Lindsey, J. Y., K. Ganguly, D. M. Brass, Z. Li, E. N. Potts *et al*, 2011 C-kit is essential for alveolar  
820 maintenance and protection from emphysema-like disease in mice. *Am. J. Respir. Crit. Care*  
821 *Med.* **183**: 1644-1652.
- 822 Liu, X., S. White, B. Peng, A. D. Johnson, J. A. Brody *et al*, 2016 WGSA: An annotation pipeline  
823 for human genome sequencing studies. *J. Med. Genet.* **53**: 111-112.

- 824 Mak, A. C. Y., M. J. White, W. L. Eckalbar, Z. A. Szpiech, S. S. Oh *et al*, 2018 Whole-genome  
825 sequencing of pharmacogenetic drug response in racially diverse children with asthma. *Am. J.*  
826 *Respir. Crit. Care Med.* **197**: 1552-1564.
- 827 Mak, A. C., M. J. White, C. Eng, D. Hu, S. Huntsman *et al*, 2016 *Whole Genome Sequencing to*  
828 *Identify Genetic Variation Associated with Bronchodilator Response in Minority Children with*  
829 *Asthma*.
- 830 Martin, A. R., C. R. Gignoux, R. K. Walters, G. L. Wojcik, B. M. Neale *et al*, 2017 Human  
831 demographic history impacts genetic risk prediction across diverse populations. *Am. J. Hum.*  
832 *Genet.* **100**: 635-649.
- 833 Martin, J. S., Z. Xu, A. P. Reiner, K. L. Mohlke, P. Sullivan *et al*, 2017 HUGIn: Hi-C unifying  
834 genomic interrogator. *Bioinformatics* **33**: 3793-3795.
- 835 McKercher, S. R., B. E. Torbett, K. L. Anderson, G. W. Henkel, D. J. Vestal *et al*, 1996 Targeted  
836 disruption of the PU.1 gene results in multiple hematopoietic abnormalities. *EMBO J.* **15**: 5647-  
837 5658.
- 838 Mekori, Y. A., C. K. Oh and D. D. Metcalfe, 1993 IL-3-dependent murine mast cells undergo  
839 apoptosis on removal of IL-3. prevention of apoptosis by c-kit ligand. *J. Immunol.* **151**: 3775-  
840 3784.

- 841 Mendez-Enriquez, E., and J. Hallgren, 2019 Mast cells and their progenitors in allergic asthma.  
842 *Front. Immunol.* **10**: 821.
- 843 Moore, J. H., 2005 A global view of epistasis. *Nat. Genet.* **37**: 13-14.
- 844 Moore, J. H., and S. M. Williams, 2009 Epistasis and its implications for personal genetics. *Am. J.*  
845 *Hum. Genet.* **85**: 309-320.
- 846 Mott, L., 1995 The disproportionate impact of environmental health threats on children of  
847 color. *Environ. Health Perspect.* **103 Suppl 6**: 33-35.
- 848 Neophytou, A. M., M. J. White, S. S. Oh, N. Thakur, J. M. Galanter *et al*, 2016 Air pollution and  
849 lung function in minority youth with asthma in the GALA II (genes-environments and admixture  
850 in latino americans) and SAGE II (study of african americans, asthma, genes, and environments)  
851 studies. *Am. J. Respir. Crit. Care Med.* **193**: 1271-1280.
- 852 Nishimura, K. K., J. M. Galanter, L. A. Roth, S. S. Oh, N. Thakur *et al*, 2013 Early-life air pollution  
853 and asthma risk in minority children. the GALA II and SAGE II studies. *Am. J. Respir. Crit. Care*  
854 *Med.* **188**: 309-318.
- 855 Nishiyama, C., M. Nishiyama, T. Ito, S. Masaki, N. Masuoka *et al*, 2004 Functional analysis of  
856 PU.1 domains in monocyte-specific gene regulation. *FEBS Lett.* **561**: 63-68.

- 857 Nishiyama, C., M. Nishiyama, T. Ito, S. Masaki, K. Maeda *et al*, 2004 Overproduction of PU.1 in  
858 mast cell progenitors: Its effect on monocyte- and mast cell-specific gene expression. *Biochem.*  
859 *Biophys. Res. Commun.* **313**: 516-521.
- 860 Oh, S. S., M. J. White, C. R. Gignoux and E. G. Burchard, 2016 Making precision medicine socially  
861 precise. take a deep breath. *Am. J. Respir. Crit. Care Med.* **193**: 348-350.
- 862 Oh, S. S., H. Tcheurekdjian, L. A. Roth, E. A. Nguyen, S. Sen *et al*, 2012 Effect of secondhand  
863 smoke on asthma control among black and latino children. *J. Allergy Clin. Immunol.* **129**: 1478-  
864 83.e7.
- 865 Oliveira, S. H., and N. W. Lukacs, 2003 Stem cell factor: A hemopoietic cytokine with important  
866 targets in asthma. *Curr. Drug Targets Inflamm. Allergy* **2**: 313-318.
- 867 Ong, B. A., J. Li, J. M. McDonough, Z. Wei, C. Kim *et al*, 2013 Gene network analysis in a  
868 pediatric cohort identifies novel lung function genes. *PLoS One* **8**: e72899.
- 869 Oriss, T. B., N. Krishnamoorthy, P. Ray and A. Ray, 2014 Dendritic cell c-kit signaling and  
870 adaptive immunity: Implications for the upper airways. *Curr. Opin. Allergy Clin. Immunol.* **14**: 7-  
871 12.
- 872 Palmer, L. J., M. W. Knuiman, M. L. Divitini, P. R. Burton, A. L. James *et al*, 2001 Familial  
873 aggregation and heritability of adult lung function: Results from the busselton health study. *Eur.*  
874 *Respir. J.* **17**: 696-702.

875 Pe'er, I., R. Yelensky, D. Altshuler and M. J. Daly, 2008 Estimation of the multiple testing burden  
876 for genomewide association studies of nearly all common variants. *Genet. Epidemiol.* **32**: 381-  
877 385.

878 Pino-Yanes, M., N. Thakur, C. R. Gignoux, J. M. Galanter, L. A. Roth *et al*, 2015 Genetic ancestry  
879 influences asthma susceptibility and lung function among latinos. *J. Allergy Clin. Immunol.* **135**:  
880 228-235.

881 Plummer, M., N. Best, K. Cowles and K. Vines, 2006 CODA: Convergence diagnosis and output  
882 analysis for MCMC. *R News* **6**: 7-11.

883 Poole, A., C. Urbanek, C. Eng, J. Schageman, S. Jacobson *et al*, 2014 Dissecting childhood asthma  
884 with nasal transcriptomics distinguishes subphenotypes of disease. *J. Allergy Clin. Immunol.*  
885 **133**: 670-8.e12.

886 Pruim, R. J., R. P. Welch, S. Sanna, T. M. Teslovich, P. S. Chines *et al*, 2010 LocusZoom: Regional  
887 visualization of genome-wide association scan results. *Bioinformatics* **26**: 2336-2337.

888 Purcell, S., and C. Chang, 2013 *Plink 1.9*. [Online] Available at: [www.cog-](http://www.cog-genomics.org/plink/1.9/)  
889 [genomics.org/plink/1.9/](http://www.cog-genomics.org/plink/1.9/). [Accessed 2019 Mar].

890 Qian, F., J. Deng, Y. G. Lee, J. Zhu, M. Karpurapu *et al*, 2015 The transcription factor PU.1  
891 promotes alternative macrophage polarization and asthmatic airway inflammation. *J. Mol. Cell.*  
892 *Biol.* **7**: 557-567.

- 893 Repapi, E., I. Sayers, L. V. Wain, P. R. Burton, T. Johnson *et al*, 2010 Genome-wide association  
894 study identifies five loci associated with lung function. *Nat. Genet.* **42**: 36-44.
- 895 Rochman, M., A. V. Kartashov, J. M. Caldwell, M. H. Collins, E. M. Stucke *et al*, 2015  
896 Neurotrophic tyrosine kinase receptor 1 is a direct transcriptional and epigenetic target of IL-13  
897 involved in allergic inflammation. *Mucosal Immunol.* **8**: 785-798.
- 898 Schmitt, A. D., M. Hu, I. Jung, Z. Xu, Y. Qiu *et al*, 2016 A compendium of chromatin contact maps  
899 reveals spatially active regions in the human genome. *Cell. Rep.* **17**: 2042-2059.
- 900 Scott, E. W., M. C. Simon, J. Anastasi and H. Singh, 1994 Requirement of transcription factor  
901 PU.1 in the development of multiple hematopoietic lineages. *Science* **265**: 1573-1577.
- 902 Scott, E. W., R. C. Fisher, M. C. Olson, E. W. Kehrli, M. C. Simon *et al*, 1997 PU.1 functions in a  
903 cell-autonomous manner to control the differentiation of multipotential lymphoid-myeloid  
904 progenitors. *Immunity* **6**: 437-447.
- 905 Sillanpaa, E., S. Sipila, T. Tormakangas, J. Kaprio and T. Rantanen, 2017 Genetic and  
906 environmental effects on telomere length and lung function: A twin study. *J. Gerontol. A Biol.*  
907 *Sci. Med. Sci.* **72**: 1561-1568.
- 908 Sofer, T., X. Zheng, S. M. Gogarten, C. A. Laurie, K. Grinde *et al*, 2019 A fully adjusted two-stage  
909 procedure for rank-normalization in genetic association studies. *Genet. Epidemiol.* **43**: 263-275.

- 910 Soler Artigas, M., L. V. Wain, S. Miller, A. K. Kheirallah, J. E. Huffman *et al*, 2015 Sixteen new  
911 lung function signals identified through 1000 genomes project reference panel imputation. *Nat.*  
912 *Commun.* **6**: 8658.
- 913 Soler Artigas, M., D. W. Loth, L. V. Wain, S. A. Gharib, M. Obeidat *et al*, 2011 Genome-wide  
914 association and large-scale follow up identifies 16 new loci influencing lung function. *Nat.*  
915 *Genet.* **43**: 1082-1090.
- 916 Summer Institute in Statistical Genetics, 2019 *PC-Relate*. [Online] Available at: [https://uw-](https://uw-gac.github.io/SISG_2019/pc-relate.html)  
917 [gac.github.io/SISG\\_2019/pc-relate.html](https://uw-gac.github.io/SISG_2019/pc-relate.html). [Accessed 2019 Jul 25].
- 918 Taliun, D., D. N. Harris, M. D. Kessler, J. Carlson, Z. A. Szpiech *et al*, 2019 Sequencing of 53,831  
919 diverse genomes from the NHLBI TOPMed program. *bioRxiv* 563866.
- 920 Tayel, S. I., S. M. El-Hefnway, Abd El Gayed, E. M. and G. A. Abdelaal, 2017 Association of stem  
921 cell factor gene expression with severity and atopic state in patients with bronchial asthma.  
922 *Respir. Res.* **18**: 21-2.
- 923 Tian, X., C. Xu, Y. Wu, J. Sun, H. Duan *et al*, 2017 Genetic and environmental influences on  
924 pulmonary function and muscle strength: The chinese twin study of aging. *Twin Res. Hum.*  
925 *Genet.* **20**: 53-59.



- 926 TOPMed, 2019 *TOPMed Whole Genome Sequencing Methods: Freeze 8*. [Online] Available at:  
927 <https://www.nhlbiwgs.org/topmed-whole-genome-sequencing-methods-freeze-8>. [Accessed  
928 2019 Dec 13].
- 929 United States Environmental Protection Agency, 2011 *National Emissions Inventory (NEI) 2011*  
930 *Data*. [Online] Available at: [https://www.epa.gov/air-emissions-inventories/2011-national-](https://www.epa.gov/air-emissions-inventories/2011-national-emissions-inventory-nei-data)  
931 [emissions-inventory-nei-data](https://www.epa.gov/air-emissions-inventories/2011-national-emissions-inventory-nei-data). [Accessed 2020 Jan 8].
- 932 United States Environmental Protection Agency, 2008 *National Emissions Inventory (NEI) 2008*  
933 *Data*. [Online] Available at: [https://www.epa.gov/air-emissions-inventories/2008-national-](https://www.epa.gov/air-emissions-inventories/2008-national-emissions-inventory-nei-data)  
934 [emissions-inventory-nei-data](https://www.epa.gov/air-emissions-inventories/2008-national-emissions-inventory-nei-data). [Accessed 2020 Jan 8].
- 935 University of Michigan, and NHLBI TOPMed, 2018 *BRAVO Variant Browser*. [Online] Available  
936 at: <https://bravo.sph.umich.edu/freeze5/hg38/>. [Accessed 2019 Aug].
- 937 Usemann, J., F. Decrue, I. Korten, E. Proietti, O. Gorlanova *et al*, 2019 Exposure to moderate air  
938 pollution and associations with lung function at school-age: A birth cohort study. *Environ. Int.*  
939 **126**: 682-689.
- 940 Valent, P., E. Spanblochl, W. R. Sperr, C. Sillaber, K. M. Zsebo *et al*, 1992 Induction of  
941 differentiation of human mast cells from bone marrow and peripheral blood mononuclear cells  
942 by recombinant human stem cell factor/kit-ligand in long-term culture. *Blood* **80**: 2237-2245.

- 943 Wain, L. V., N. Shrine, M. S. Artigas, A. M. Erzurumluoglu, B. Noyvert *et al*, 2017 Genome-wide  
944 association analyses for lung function and chronic obstructive pulmonary disease identify new  
945 loci and potential druggable targets. *Nat. Genet.* **49**: 416-425.
- 946 Walsh, J. C., R. P. DeKoter, H. J. Lee, E. D. Smith, D. W. Lancki *et al*, 2002 Cooperative and  
947 antagonistic interplay between PU.1 and GATA-2 in the specification of myeloid cell fates.  
948 *Immunity* **17**: 665-676.
- 949 Wan, H., S. Dingle, Y. Xu, V. Besnard, K. H. Kaestner *et al*, 2005 Compensatory roles of Foxa1  
950 and Foxa2 during lung morphogenesis. *J. Biol. Chem.* **280**: 13809-13816.
- 951 Wen, L. P., J. A. Fahrni, S. Matsui and G. D. Rosen, 1996 Airway epithelial cells produce stem cell  
952 factor. *Biochim. Biophys. Acta* **1314**: 183-186.
- 953 White, M. J., O. Risse-Adams, P. Goddard, M. G. Contreras, J. Adams *et al*, 2016 Novel genetic  
954 risk factors for asthma in african american children: Precision medicine and the SAGE II study.  
955 *Immunogenetics* **68**: 391-400.
- 956 Wise, J., 2019 Air pollution is linked to infant deaths and reduced lung function in children. *BMJ*  
957 **366**: l5772.
- 958 Wojcik, G. L., M. Graff, K. K. Nishimura, R. Tao, J. Haessler *et al*, 2019 Genetic analyses of  
959 diverse populations improves discovery for complex traits. *Nature* **570**: 514-518.

- 960 World Health Organization, 2017 *Asthma*. [Online] Available at:  
961 <http://www.who.int/mediacentre/factsheets/fs307/en/>. [Accessed 2020 Jan 8].
- 962 Yamada, H., Y. Yatagai, H. Masuko, T. Sakamoto, H. Iijima *et al*, 2015 Heritability of pulmonary  
963 function estimated from genome-wide SNPs in healthy japanese adults. *Respir. Investig.* **53**: 60-  
964 67.
- 965 Yashiro, T., S. Nakano, K. Nomura, Y. Uchida, K. Kasakura *et al*, 2019 A transcription factor PU.1  
966 is critical for Ccl22 gene expression in dendritic cells and macrophages. *Sci. Rep.* **9**: 1161-9.
- 967 Zhang, F., and J. R. Lupski, 2015 Non-coding genetic variants in human disease. *Hum. Mol. Genet.*  
968 **24**: 102.
- 969

970 Table 1. Descriptive characteristics of 867 African American children with asthma included in this study.

|                                                 | <b>African American<br/>(n=867)</b> |
|-------------------------------------------------|-------------------------------------|
| <b>Age</b>                                      |                                     |
| Mean (SD)                                       | 14.1 (3.64)                         |
| Median [25%, 75%]                               | 13.8 [10.98, 17.11]                 |
| <b>Sex</b>                                      |                                     |
| Male                                            | 439 (50.6%)                         |
| Female                                          | 428 (49.4%)                         |
| <b>Height (m)</b>                               |                                     |
| Mean (SD)                                       | 1.58 (0.145)                        |
| Median [25%, 75%]                               | 1.60 [1.47, 1.68]                   |
| <b>Any control medications* in last 2 weeks</b> |                                     |
| No                                              | 543 (62.6%)                         |
| Yes                                             | 324 (37.4%)                         |
| <b>ICS in last 2 weeks</b>                      |                                     |
| No                                              | 211 (24.3%)                         |
| Yes                                             | 306 (35.3%)                         |
| Missing                                         | 350 (40.4%)                         |
| <b>LABA in last 2 weeks</b>                     |                                     |
| No                                              | 5 (0.6%)                            |
| Yes                                             | 94 (10.8%)                          |
| Missing                                         | 768 (88.6%)                         |
| <b>Leukotriene inhibitor in last 2 weeks</b>    |                                     |
| No                                              | 11 (1.3%)                           |
| Yes                                             | 68 (7.8%)                           |
| Missing                                         | 788 (90.9%)                         |
| <b>African ancestry</b>                         |                                     |
| Mean (SD)                                       | 0.792 (0.129)                       |
| Median [25%, 75%]                               | 0.826 [0.759, 0.869]                |
| <b>Smoking status</b>                           |                                     |
| Never                                           | 793 (91.5%)                         |
| Past                                            | 72 (8.3%)                           |
| Current                                         | 0 (0%)                              |
| Missing                                         | 2 (0.2%)                            |
| <b>Number of smokers in family</b>              |                                     |
| 0                                               | 469 (54.1%)                         |
| 1                                               | 137 (15.8%)                         |
| 2                                               | 42 (4.8%)                           |
| 3+                                              | 10 (1.2%)                           |
| Missing                                         | 209 (24.1%)                         |

**SO2 first year exposure (ppb)**

|                   |                   |
|-------------------|-------------------|
| Mean (SD)         | 1.59 (0.961)      |
| Median [25%, 75%] | 1.50 [1.24, 1.87] |
| Missing           | 227 (26.2%)       |

**SO2 past year exposure (ppb)**

|                   |                    |
|-------------------|--------------------|
| Mean (SD)         | 1.10 (0.302)       |
| Median [25%, 75%] | 1.08 [0.910, 1.27] |
| Missing           | 206 (23.8%)        |

**SO2 lifetime exposure (ppb)**

|                   |                   |
|-------------------|-------------------|
| Mean (SD)         | 1.50 (0.371)      |
| Median [25%, 75%] | 1.47 [1.40, 1.54] |
| Missing           | 206 (23.8%)       |

**TOPMed sequencing center and phase**

|                |             |
|----------------|-------------|
| phase 1, CAAPA | 6 (0.7%)    |
| phase 1, NYGC  | 460 (53.1%) |
| phase 3, NW    | 401 (46.3%) |

971 25% and 75%, 25 and 75 percentiles. Control medications include inhaled corticosteroid (ICS),  
972 long-acting beta-agonist (LABA), leukotriene inhibitor and/or ICS/LABA combo. SO<sub>2</sub> exposure  
973 are hourly exposure averaged over the specified time period before spirometry testing as  
974 previously described in Neophytou *et al.* 2016. ppb, parts per billion or µg/m<sup>3</sup>.  
975

976 Table 2. Genome-wide lung function association in SAGE II children with asthma.

| M  | rsID          | Alt | $\beta$ | p        | $\beta_{norm}$ | $p_{norm}$ | MAF   | 1000 Genomes |       |       |       | Score |
|----|---------------|-----|---------|----------|----------------|------------|-------|--------------|-------|-------|-------|-------|
|    |               |     |         |          |                |            |       | ALL          | AFR   | AMR   | EUR   |       |
| 1  | rs11835305    | T   | 0.126   | 1.93E-05 | 0.320          | 3.69E-05   | 0.104 | 0.036        | 0.119 | 0.012 | 0.001 | 0     |
| 2  | rs17015963    | C   | 0.126   | 1.93E-05 | 0.320          | 3.69E-05   | 0.104 | 0.036        | 0.120 | 0.012 | 0.001 | 0     |
| 3  | rs58475486*   | T   | 0.127   | 1.45E-05 | 0.323          | 2.81E-05   | 0.105 | 0.037        | 0.123 | 0.012 | 0.001 | 2^    |
| 4  | rs17015979    | T   | 0.127   | 1.45E-05 | 0.323          | 2.81E-05   | 0.105 | 0.037        | 0.123 | 0.012 | 0.001 | 0     |
| 5  | rs57692452    | C   | 0.245   | 1.63E-06 | 0.654          | 1.06E-06   | 0.033 | 0.011        | 0.030 | 0.006 | 0.001 | 2^    |
| 6  | rs112585732   | T   | 0.235   | 4.35E-07 | 0.625          | 3.06E-07   | 0.041 | 0.016        | 0.050 | 0.006 | 0.001 | 0     |
| 7  | rs113837356   | T   | 0.270   | 3.44E-06 | 0.719          | 2.49E-06   | 0.025 | 0.008        | 0.027 | 0.006 | 0.001 | 1     |
| 8  | rs61441836    | G   | 0.252   | 8.19E-07 | 0.671          | 5.46E-07   | 0.033 | 0.010        | 0.030 | 0.006 | 0.001 | 1     |
| 9  | rs73438172    | A   | 0.252   | 8.19E-07 | 0.671          | 5.46E-07   | 0.033 | 0.010        | 0.030 | 0.006 | 0.001 | 1     |
| 10 | rs1044043958& | A   | 0.270   | 3.44E-06 | 0.719          | 2.49E-06   | 0.025 | -            | -     | -     | -     | 0     |
| 11 | rs73438182    | G   | 0.138   | 1.68E-04 | 0.378          | 9.18E-05   | 0.064 | 0.020        | 0.068 | 0.006 | 0.001 | 0     |
| 12 | rs73438185    | A   | 0.138   | 1.68E-04 | 0.378          | 9.18E-05   | 0.064 | 0.020        | 0.068 | 0.006 | 0.001 | 0     |
| 13 | rs73438188    | A   | 0.297   | 6.97E-08 | 0.792          | 4.42E-08   | 0.028 | 0.010        | 0.027 | 0.006 | 0.001 | 1     |
| 14 | rs73438190    | C   | 0.181   | 1.86E-05 | 0.486          | 1.22E-05   | 0.048 | 0.016        | 0.047 | 0.006 | 0.001 | 0     |
| 15 | rs73438195    | A   | 0.181   | 1.86E-05 | 0.486          | 1.22E-05   | 0.048 | 0.016        | 0.047 | 0.006 | 0.001 | 0     |
| 16 | rs111857459   | T   | 0.181   | 1.86E-05 | 0.486          | 1.22E-05   | 0.048 | 0.016        | 0.047 | 0.006 | 0.001 | 0     |
| 17 | rs144369986&  | T   | 0.285   | 1.21E-06 | 0.756          | 9.44E-07   | 0.025 | 0.008        | 0.026 | 0.006 | 0.001 | 0     |
| 18 | rs73440106    | G   | 0.181   | 1.86E-05 | 0.486          | 1.22E-05   | 0.048 | 0.016        | 0.047 | 0.006 | 0.001 | 0     |
| 19 | rs73440107    | A   | 0.297   | 6.97E-08 | 0.792          | 4.42E-08   | 0.028 | 0.010        | 0.027 | 0.006 | 0.001 | 1     |
| 20 | rs111453514   | C   | 0.297   | 6.97E-08 | 0.792          | 4.42E-08   | 0.028 | 0.010        | 0.027 | 0.006 | 0.001 | 1     |
| 21 | rs73440112    | T   | 0.297   | 6.97E-08 | 0.792          | 4.42E-08   | 0.028 | 0.010        | 0.027 | 0.006 | 0.001 | 1     |
| 22 | rs73440115    | G   | 0.297   | 6.97E-08 | 0.792          | 4.42E-08   | 0.028 | 0.011        | 0.028 | 0.006 | 0.001 | 1     |
| 23 | rs11312747&   | A   | 0.133   | 1.43E-05 | 0.357          | 8.51E-06   | 0.100 | 0.036        | 0.121 | 0.010 | 0.001 | 0     |
| 24 | rs73440120    | A   | 0.285   | 1.21E-06 | 0.756          | 9.44E-07   | 0.025 | 0.008        | 0.026 | 0.006 | 0.001 | 1     |
| 25 | rs111289668   | G   | 0.297   | 6.97E-08 | 0.792          | 4.42E-08   | 0.028 | 0.010        | 0.027 | 0.006 | 0.001 | 2^    |
| 26 | rs73440122    | C   | 0.292   | 2.08E-07 | 0.775          | 1.55E-07   | 0.027 | 0.011        | 0.030 | 0.006 | 0.001 | 3^    |
| 27 | rs73440123    | G   | 0.292   | 2.08E-07 | 0.775          | 1.55E-07   | 0.027 | 0.011        | 0.030 | 0.006 | 0.001 | 1     |
| 28 | rs17016065*   | G   | 0.112   | 3.19E-06 | 0.296          | 2.54E-06   | 0.177 | 0.075        | 0.217 | 0.017 | 0.009 | 1#    |
| 29 | rs17016066    | A   | 0.112   | 3.19E-06 | 0.296          | 2.54E-06   | 0.177 | 0.075        | 0.217 | 0.017 | 0.009 | 1#    |
| 30 | rs147400083&  | T   | 0.112   | 3.19E-06 | 0.296          | 2.54E-06   | 0.177 | -            | -     | -     | -     | 0     |
| 31 | rs866852270   | T   | 0.112   | 3.19E-06 | 0.296          | 2.54E-06   | 0.177 | -            | -     | -     | -     | 0     |
| 32 | rs141293300&  | C   | 0.292   | 2.08E-07 | 0.775          | 1.55E-07   | 0.027 | 0.011        | 0.030 | 0.006 | 0.001 | 1     |
| 33 | rs1398303     | A   | 0.104   | 1.22E-05 | 0.274          | 1.12E-05   | 0.186 | 0.077        | 0.223 | 0.020 | 0.009 | 1#    |
| 34 | rs61924868    | T   | 0.104   | 1.24E-05 | 0.275          | 1.14E-05   | 0.185 | 0.078        | 0.223 | 0.020 | 0.009 | 1#    |

|    |                              |   |       |          |       |          |       |       |       |       |       |    |
|----|------------------------------|---|-------|----------|-------|----------|-------|-------|-------|-------|-------|----|
| 35 | rs73440134                   | T | 0.292 | 2.08E-07 | 0.775 | 1.55E-07 | 0.027 | 0.011 | 0.030 | 0.006 | 0.001 | 1  |
| 36 | rs73429413                   | G | 0.292 | 2.08E-07 | 0.775 | 1.55E-07 | 0.027 | 0.011 | 0.030 | 0.006 | 0.001 | 1  |
| 37 | rs73429415                   | A | 0.096 | 5.13E-05 | 0.253 | 4.84E-05 | 0.189 | 0.078 | 0.225 | 0.022 | 0.009 | 1# |
| 38 | rs112449284                  | T | 0.242 | 4.64E-06 | 0.640 | 3.87E-06 | 0.031 | 0.012 | 0.035 | 0.007 | 0.001 | 1  |
| 39 | rs111981782                  | C | 0.296 | 5.78E-08 | 0.786 | 4.09E-08 | 0.029 | 0.012 | 0.033 | 0.006 | 0.001 | 1  |
| 40 | rs150942400                  | T | 0.293 | 6.01E-08 | 0.780 | 4.01E-08 | 0.029 | 0.012 | 0.034 | 0.006 | 0.002 | 1  |
| 41 | rs147527487                  | C | 0.086 | 8.49E-05 | 0.226 | 8.14E-05 | 0.205 | 0.095 | 0.249 | 0.016 | 0.005 | 0  |
| 42 | rs111243672                  | A | 0.258 | 6.41E-07 | 0.690 | 3.99E-07 | 0.032 | 0.014 | 0.037 | 0.007 | 0.004 | 1  |
| 43 | rs73429450*                  | A | 0.302 | 1.26E-08 | 0.801 | 9.01E-09 | 0.031 | 0.012 | 0.033 | 0.009 | 0.002 | 1  |
| 44 | rs758775577                  | C | 0.217 | 2.22E-06 | 0.574 | 1.85E-06 | 0.041 | -     | -     | -     | -     | 0  |
| 45 | rs142679473 <sup>&amp;</sup> | C | 0.285 | 6.30E-08 | 0.756 | 4.62E-08 | 0.031 | 0.012 | 0.033 | 0.009 | 0.002 | 0  |

977 Score, priority score based on statistical and functional evidences which are reported in Table

978 S12. M, marker number that corresponds to those in Figure 2 and Table S12. Candidate variants

979 were prioritized if they had a priority score of greater than 2 (^) or if they are eQTL of KITLG in

980 nasal epithelial cells (#). The three independent signals identified in the conditional analyses are

981 marked with \* near the rsID. Indels were marked with the superscript & near the rsID.  $\beta$  ( $\rho$ ) and

982  $\beta_{\text{norm}}$  ( $\rho_{\text{norm}}$ ) are the effect sizes (p-values) of the genetic associations of the alternate allele (alt)

983 with FEV<sub>1</sub> and FEV<sub>1.res.rnorm</sub> respectively. MAF minor allele frequency. ALL/AFR/AMR/EUR,

984 1000 Genomes minor allele frequency from all/African/American/European populations. -, not

985 available.

986 Table 3. Gene-and-environment analysis on FEV<sub>1</sub>

| Variant                    | Exposure                   | n   | Variant |          | Exposure |       | GxE     |       |    |
|----------------------------|----------------------------|-----|---------|----------|----------|-------|---------|-------|----|
|                            |                            |     | $\beta$ | p        | $\beta$  | p     | $\beta$ | p     |    |
| rs58475486_T <sup>1</sup>  | SO <sub>2</sub> first year | 640 | 0.13    | 6.62E-06 | -0.05    | 0.003 | -0.03   | 0.658 |    |
| rs57692452_C <sup>2</sup>  | SO <sub>2</sub> first year | 640 | 0.25    | 1.16E-06 | -0.05    | 0.003 | -0.24   | 0.091 |    |
| rs111289668_G <sup>2</sup> | SO <sub>2</sub> first year | 640 | 0.31    | 2.53E-08 | -0.05    | 0.003 | -0.27   | 0.079 |    |
| rs73440122_C <sup>2</sup>  | SO <sub>2</sub> first year | 640 | 0.31    | 7.78E-08 | -0.05    | 0.003 | -0.32   | 0.045 | *  |
| rs17016065_G <sup>3</sup>  | SO <sub>2</sub> first year | 640 | 0.11    | 8.82E-06 | -0.05    | 0.003 | -0.08   | 0.108 |    |
| rs17016066_A <sup>3</sup>  | SO <sub>2</sub> first year | 640 | 0.11    | 8.82E-06 | -0.05    | 0.003 | -0.08   | 0.108 |    |
| rs1398303_A <sup>3</sup>   | SO <sub>2</sub> first year | 640 | 0.10    | 3.15E-05 | -0.05    | 0.003 | -0.09   | 0.082 |    |
| rs61924868_T <sup>3</sup>  | SO <sub>2</sub> first year | 640 | 0.10    | 3.30E-05 | -0.05    | 0.003 | -0.08   | 0.088 |    |
| rs73429415_A <sup>3</sup>  | SO <sub>2</sub> first year | 640 | 0.09    | 1.09E-04 | -0.05    | 0.003 | -0.09   | 0.069 |    |
| rs58475486_T <sup>1</sup>  | SO <sub>2</sub> past year  | 661 | 0.13    | 6.62E-06 | 0.05     | 0.362 | 0.32    | 0.003 | ** |
| rs57692452_C <sup>2</sup>  | SO <sub>2</sub> past year  | 661 | 0.25    | 1.16E-06 | 0.05     | 0.362 | 0.29    | 0.100 |    |
| rs111289668_G <sup>2</sup> | SO <sub>2</sub> past year  | 661 | 0.31    | 2.53E-08 | 0.05     | 0.362 | 0.41    | 0.037 | *  |
| rs73440122_C <sup>2</sup>  | SO <sub>2</sub> past year  | 661 | 0.31    | 7.78E-08 | 0.05     | 0.362 | 0.39    | 0.051 |    |
| rs17016065_G <sup>3</sup>  | SO <sub>2</sub> past year  | 661 | 0.11    | 8.82E-06 | 0.05     | 0.362 | 0.20    | 0.026 | *  |
| rs17016066_A <sup>3</sup>  | SO <sub>2</sub> past year  | 661 | 0.11    | 8.82E-06 | 0.05     | 0.362 | 0.20    | 0.026 | *  |
| rs1398303_A <sup>3</sup>   | SO <sub>2</sub> past year  | 661 | 0.10    | 3.15E-05 | 0.05     | 0.362 | 0.21    | 0.021 | *  |
| rs61924868_T <sup>3</sup>  | SO <sub>2</sub> past year  | 661 | 0.10    | 3.30E-05 | 0.05     | 0.362 | 0.21    | 0.023 | *  |
| rs73429415_A <sup>3</sup>  | SO <sub>2</sub> past year  | 661 | 0.09    | 1.09E-04 | 0.05     | 0.362 | 0.20    | 0.026 | *  |
| rs58475486_T <sup>1</sup>  | SO <sub>2</sub> lifetime   | 661 | 0.13    | 6.62E-06 | -0.13    | 0.001 | 0.26    | 0.173 |    |
| rs57692452_C <sup>2</sup>  | SO <sub>2</sub> lifetime   | 661 | 0.25    | 1.16E-06 | -0.13    | 0.001 | 0.47    | 0.221 |    |
| rs111289668_G <sup>2</sup> | SO <sub>2</sub> lifetime   | 661 | 0.31    | 2.53E-08 | -0.13    | 0.001 | 0.32    | 0.444 |    |
| rs73440122_C <sup>2</sup>  | SO <sub>2</sub> lifetime   | 661 | 0.31    | 7.78E-08 | -0.13    | 0.001 | 0.29    | 0.489 |    |
| rs17016065_G <sup>3</sup>  | SO <sub>2</sub> lifetime   | 661 | 0.11    | 8.82E-06 | -0.13    | 0.001 | -0.19   | 0.143 |    |
| rs17016066_A <sup>3</sup>  | SO <sub>2</sub> lifetime   | 661 | 0.11    | 8.82E-06 | -0.13    | 0.001 | -0.19   | 0.143 |    |
| rs1398303_A <sup>3</sup>   | SO <sub>2</sub> lifetime   | 661 | 0.10    | 3.15E-05 | -0.13    | 0.001 | -0.17   | 0.184 |    |
| rs61924868_T <sup>3</sup>  | SO <sub>2</sub> lifetime   | 661 | 0.10    | 3.30E-05 | -0.13    | 0.001 | -0.17   | 0.199 |    |
| rs73429415_A <sup>3</sup>  | SO <sub>2</sub> lifetime   | 661 | 0.09    | 1.09E-04 | -0.13    | 0.001 | -0.16   | 0.207 |    |

987 \*, p < 0.05; \*\*, p < bonferroni p value of 0.0056 for GxE analysis. n, sample sizes for the gene-

988 by-SO<sub>2</sub> interaction analysis. Superscript 1 to 3 in the variant column, variants that are in LD with

989 the 3 independent signals, rs58475486, rs73429450 and rs17016065, respectively.  $\beta$ , effect

990 sizes from the main effects of the variants, exposure and GxE interaction, respectively.

991



992 Figure 1.

993 A.

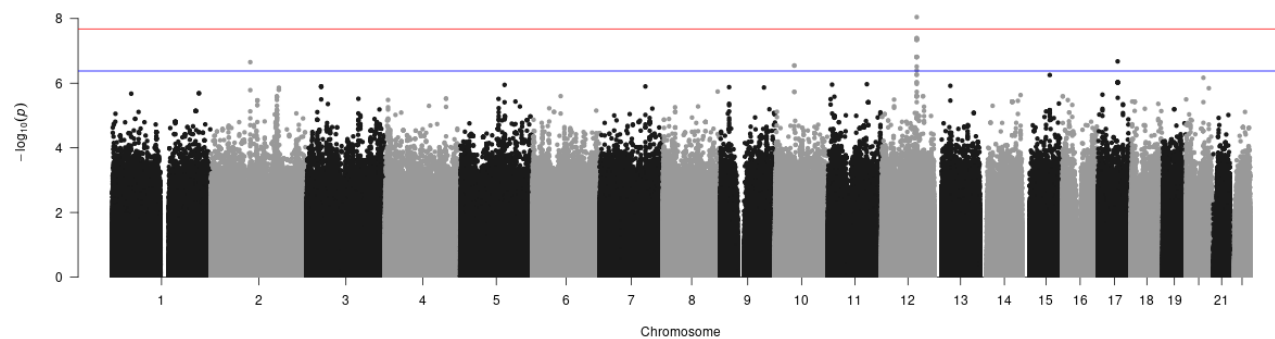

994

995 B.

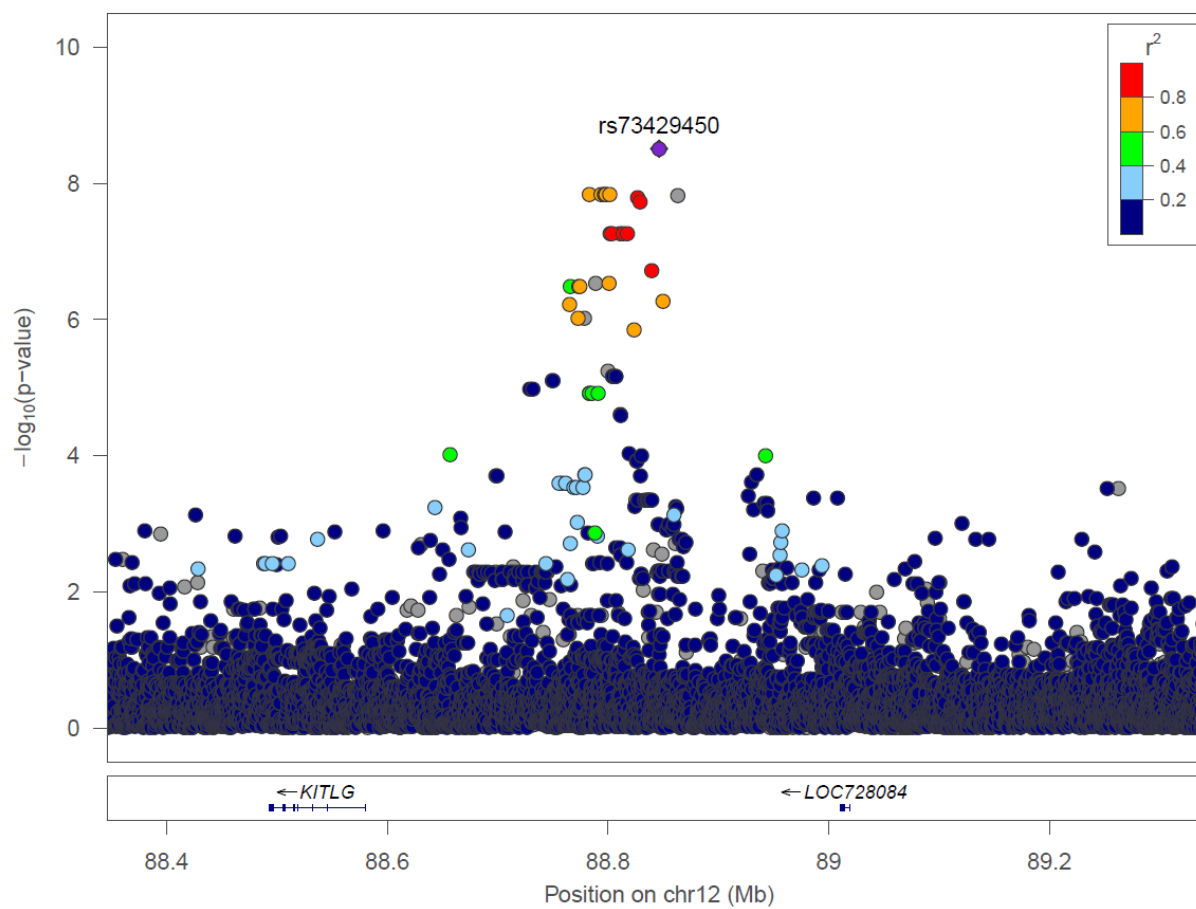

996

997 Figure 1. Manhattan and LocusZoom plots from genome-wide association study of lung function\*.  
998 (A) Manhattan plot from genome-wide association study of lung function\* using linear regression  
999 in ENCORE. Red horizontal line: CODA-adjusted genome-wide significance p-value of  $2.10 \times 10^{-8}$ .  
1000 Blue horizontal line: CODA-adjusted suggestive significance p-value of  $4.19 \times 10^{-7}$ . (B) LocusZoom  
1001 plot of rs73429450 (chr12 : 88846435) and 500 Kb flanking region. Colors show linkage  
1002 disequilibrium in the study population. \* FEV<sub>1.res.rnorm</sub> was used as the phenotype for the  
1003 association testing.  
1004

1005 Figure 2.

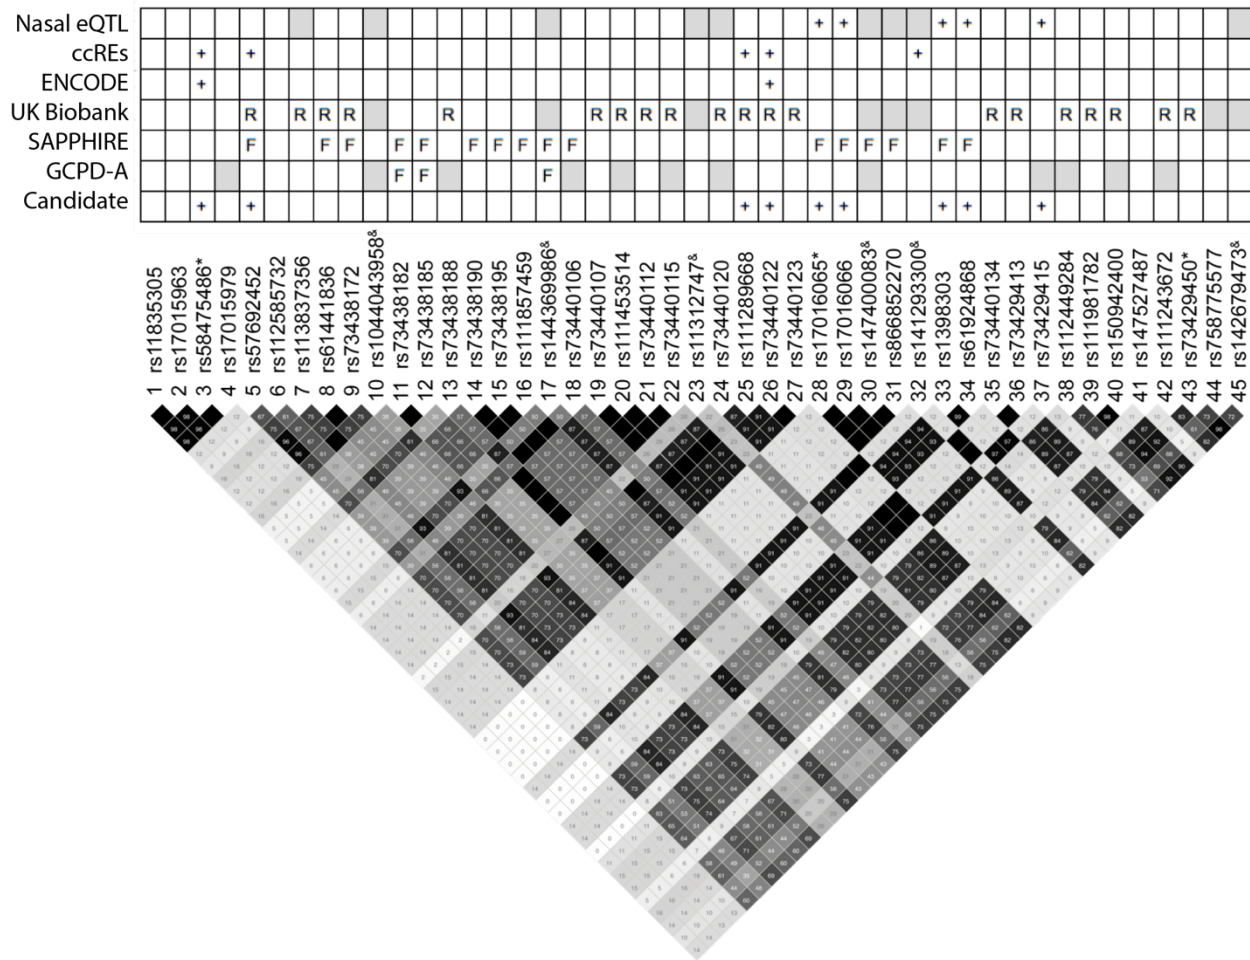

1006

1007 Figure 2. Integration of statistical and functional evidence for variant prioritization. Numbers and  
 1008 different shades of black in the LD plot represent LD in  $R^2$ . The three independent signals  
 1009 identified in the conditional analysis are marked with \*. Indels are marked with &. Nasal eQTL,  
 1010 variants eQTL of *KITLG* in nasal epithelial cells. ccREs, candidate cis-regulatory elements in  
 1011 SCREEN registry. ENCODE, DNase I hypersensitivity site and/or transcription factor ChIP-Seq  
 1012 overlapping with the variants. UK Biobank, SAPPHIRE, GCPD-A, replication results using Blacks in  
 1013 UK Biobank and African Americans in the SAPPHIRE and GCPD-A cohorts (R = replicated at  $p <$

1014 0.05; F = flip-flop association at  $p < 0.05$ ). Candidate, candidate variants prioritized because of  
1015 presence of two or more evidence or is nasal eQTL. + indicates presence of evidence. Boxes in  
1016 the top panel were shaded grey if results were not available.  
1017

1018 Figure 3.

1019 A

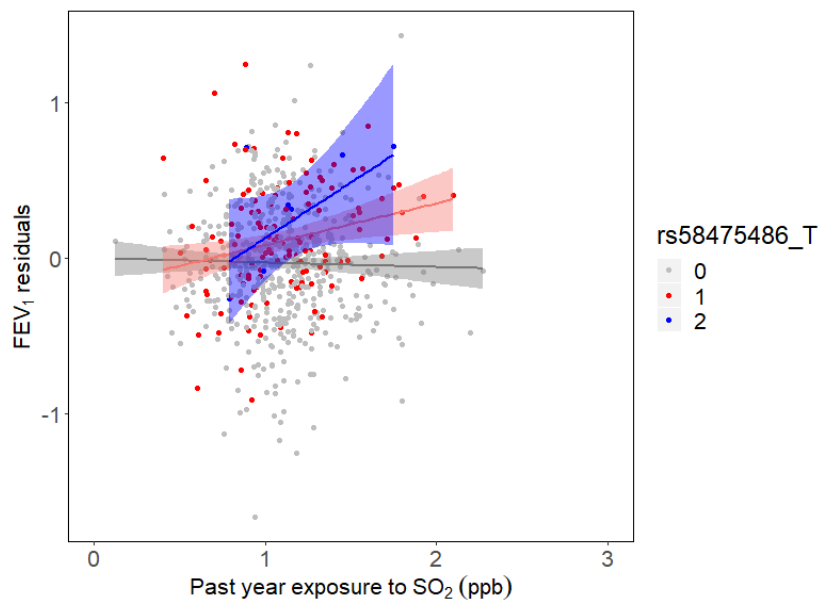

1020

1021 B

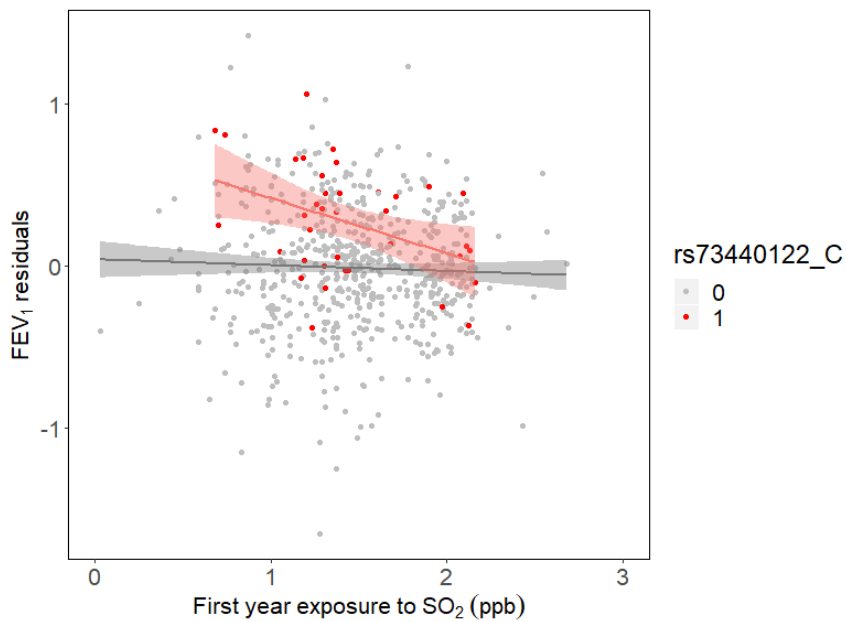

1022

1023 Figure 3. Gene-by-environment interaction analysis on FEV<sub>1</sub>. FEV<sub>1</sub> residuals, residuals after FEV<sub>1</sub>

1024 was regressed on the covariates age, sex, height, controller medications, sequencing centers and

1025 the first 5 genetic PCs. FEV<sub>1</sub> residuals was plotted against (A) past year exposure to SO<sub>2</sub> stratified  
1026 by the number of copies of T allele of rs58475486, (B) first year of life exposure to SO<sub>2</sub> stratified  
1027 by the number of copies of C allele of rs73440122.
